# Supplementary material for: Direct and one-pot conversion of polyguluronates and alginates into alkyl-l-guluronamide-based surfactant compositions
Source: Royal Society of Chemistry journal article supplement (doi:10.1039/c6gc01983h), 2016-01-01
Supplement: c6gc01983h1.pdf [file c6gc01983h1.pdf]

## Supplementary information

### Direct and one-pot conversion of polyguluronates and alginates into alkyl-L-guluronamide-based surfactant compositions

N. Sari-Chmaysem,<sup>a,b,c</sup> F. Pessel,<sup>a,b</sup> J. P. Guégan,<sup>a,b</sup> S. Taha,<sup>c</sup> H. Mawlawi,<sup>c</sup> and T. Benvegnu<sup>\*a,b</sup>

*(a) Ecole Nationale Supérieure de Chimie de Rennes, CNRS, UMR 6226, 11 Allée de Beaulieu, CS 50837, 35708 Rennes Cedex 7, France*

*(b) Université Bretagne Loire, France*

*(c) Laboratory of Applied Biotechnology, AZM Center for Research in Biotechnology and its Applications, Doctoral School for Sciences and Technology, Lebanese University, Tripoli, Lebanon*

\*Corresponding author: Tel.: +33 223 238 060; Fax: +33 223 238 046. E-mail address: [thierry.benvegnu@ensc-rennes.fr](mailto:thierry.benvegnu@ensc-rennes.fr)

**Fig.1**  $^1\text{H}$  NMR spectrum ( $\text{CDCl}_3$ ) of the mixture of lactone, furanose and pyranose guluronate monomers **1-3**. In Fig.1a, full spectrum; in Fig.1b, zoom of the anomeric  $^1\text{H}$  area.

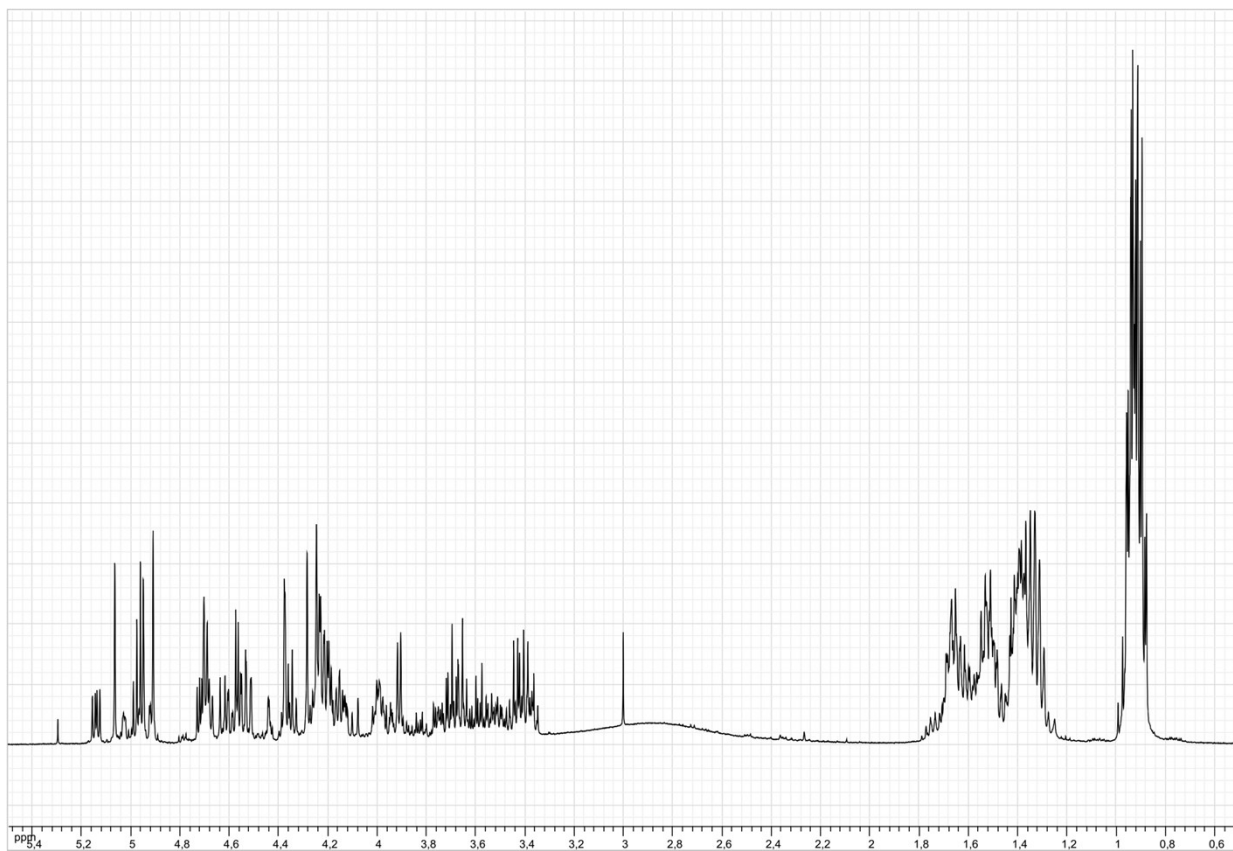

Fig.1a

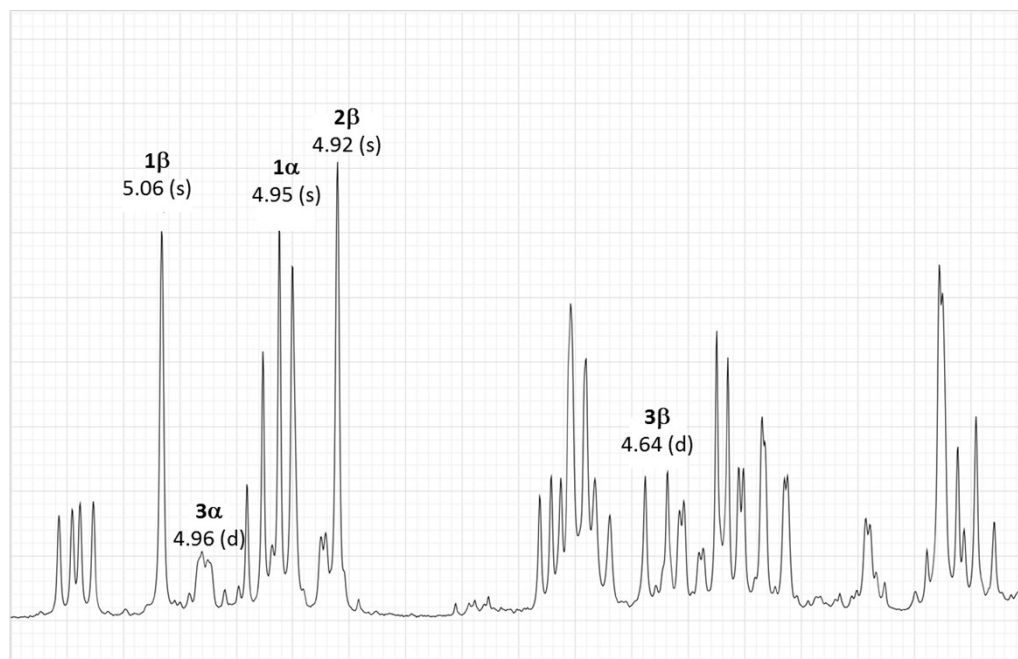

Fig.1b

**Fig.2**  $^1\text{H}$  NMR spectrum ( $\text{CDCl}_3$ ) of a **Fraction I** enriched enriched in isomer **4 $\alpha$** ,  $\alpha$ -L-Gulf (major product) and isomer **4 $\beta$** ,  $\beta$ -L-Gulf (minor product), isolated after silica gel column chromatography of the **GulC<sub>4</sub>N<sub>12</sub>** composition. In Fig.2a, full spectrum; in Fig.2b, zoom of the anomeric  $^1\text{H}$  area.

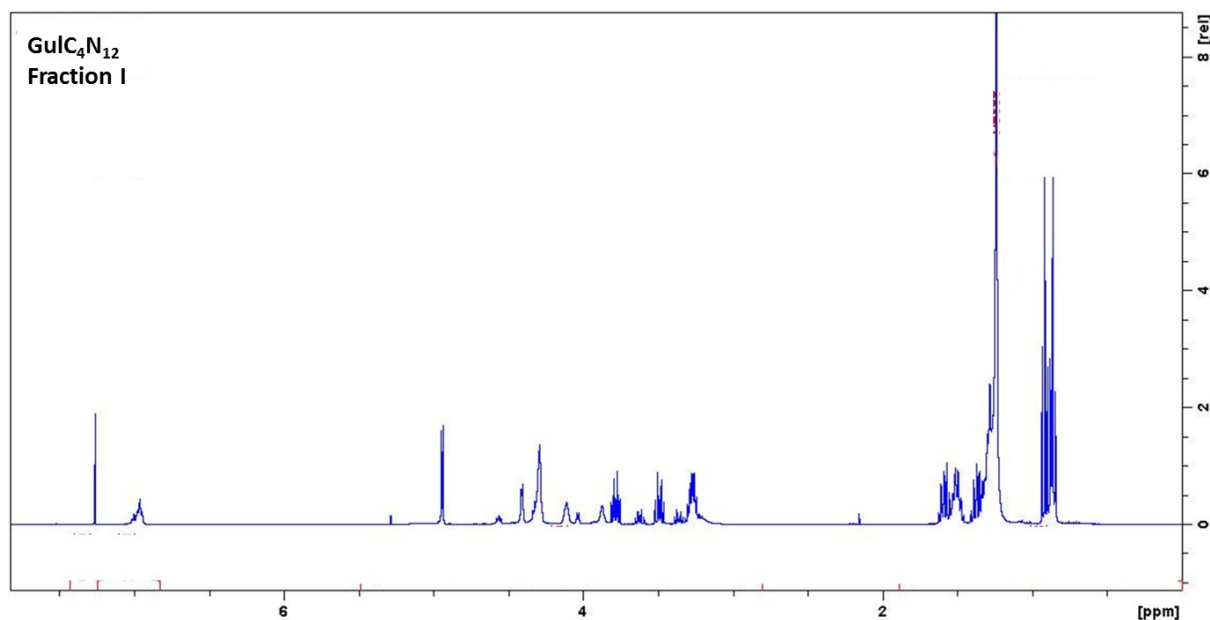

Fig.2a

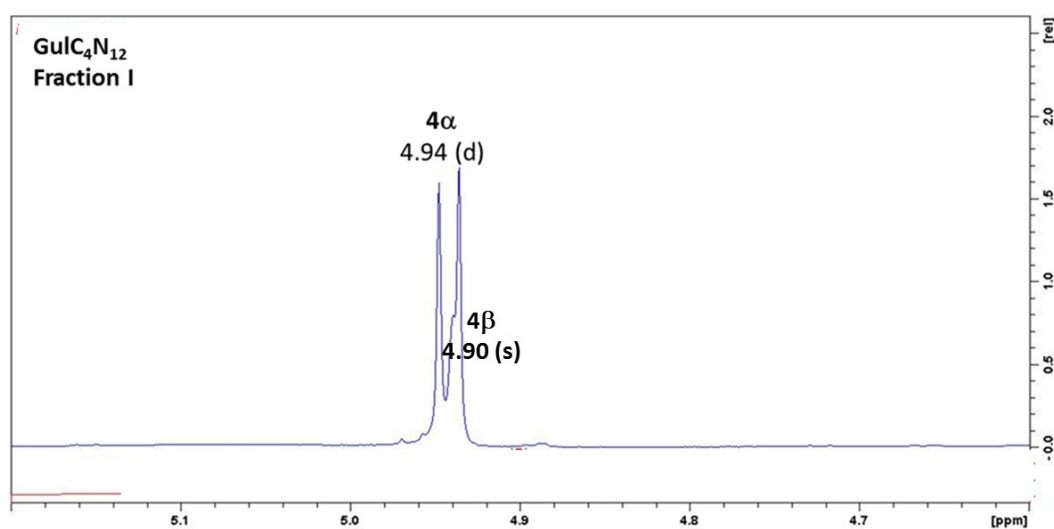

Fig.2b

**Fig.3**  $^{13}\text{C}$  (JMod) NMR spectrum ( $\text{CDCl}_3$ ) of a **Fraction I** enriched in isomer **4 $\alpha$** ,  $\alpha$ -L-Gulf (major product) and isomer **4 $\beta$** ,  $\beta$ -L-Gulf (minor product), isolated after silica gel column chromatography of the **GulC<sub>4</sub>N<sub>12</sub>** composition. In Fig.3a, full spectrum; in Fig.3b, zoom of the anomeric  $^{13}\text{C}$  area.

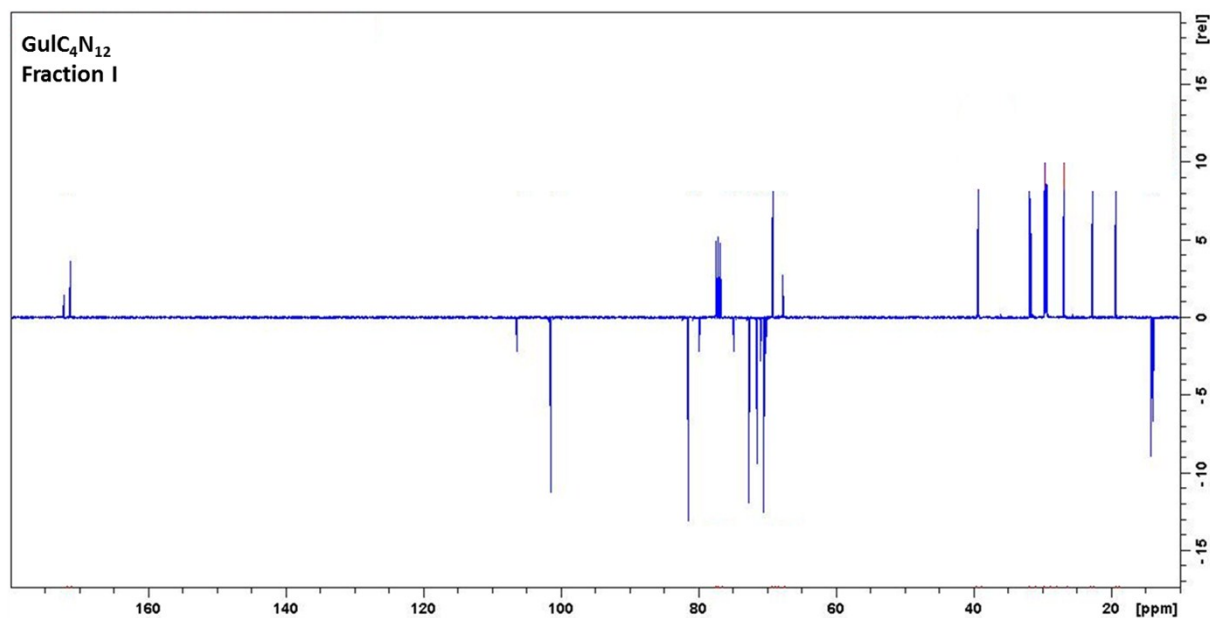

Fig.3a

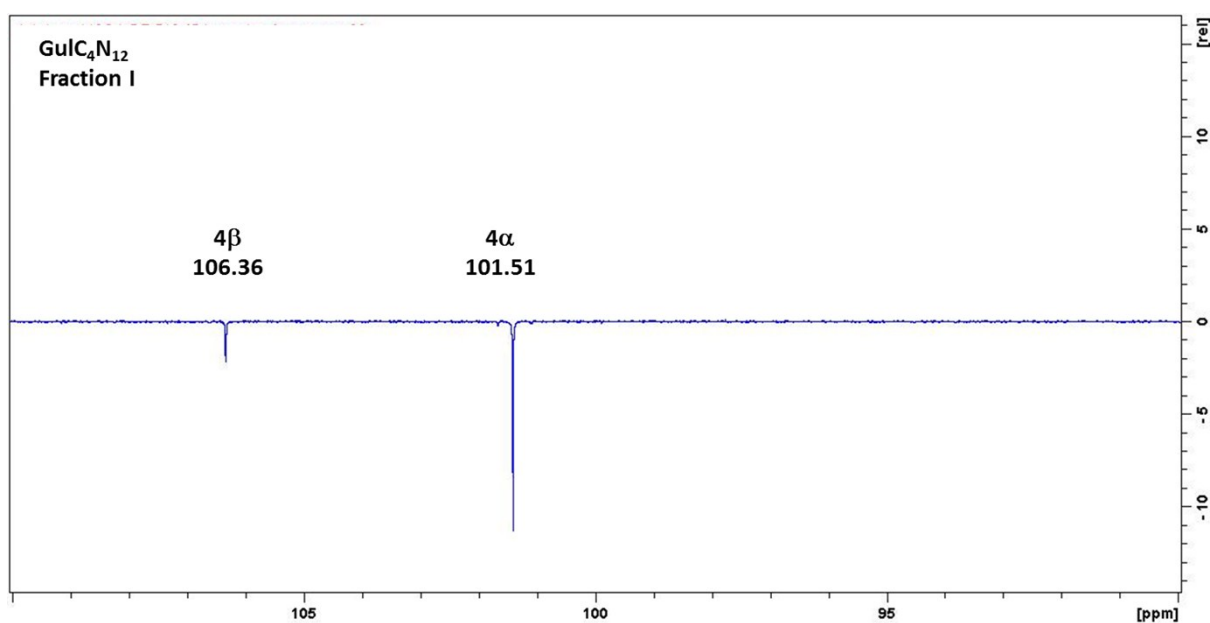

Fig.3b

**Fig.4**  $^1\text{H}$  NMR spectrum ( $\text{CDCl}_3$ ) of a **Fraction II** enriched in isomer **6 $\alpha$** ,  $\alpha$ -L-Gulp, (major product) and isomer **4 $\beta$** ,  $\beta$ -L-Gulf (minor product), isolated after silica gel column chromatography of the **GulC<sub>4</sub>N<sub>12</sub>** composition. In Fig.4a, full spectrum; in Fig.4b, zoom of the anomeric  $^1\text{H}$  area.

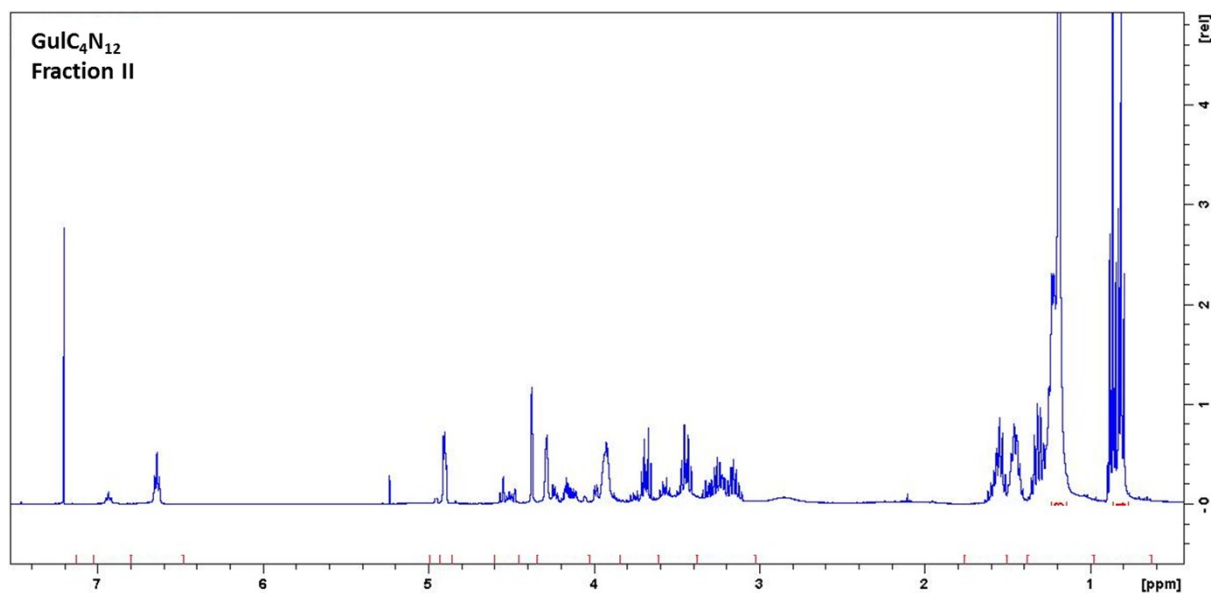

Fig.4a

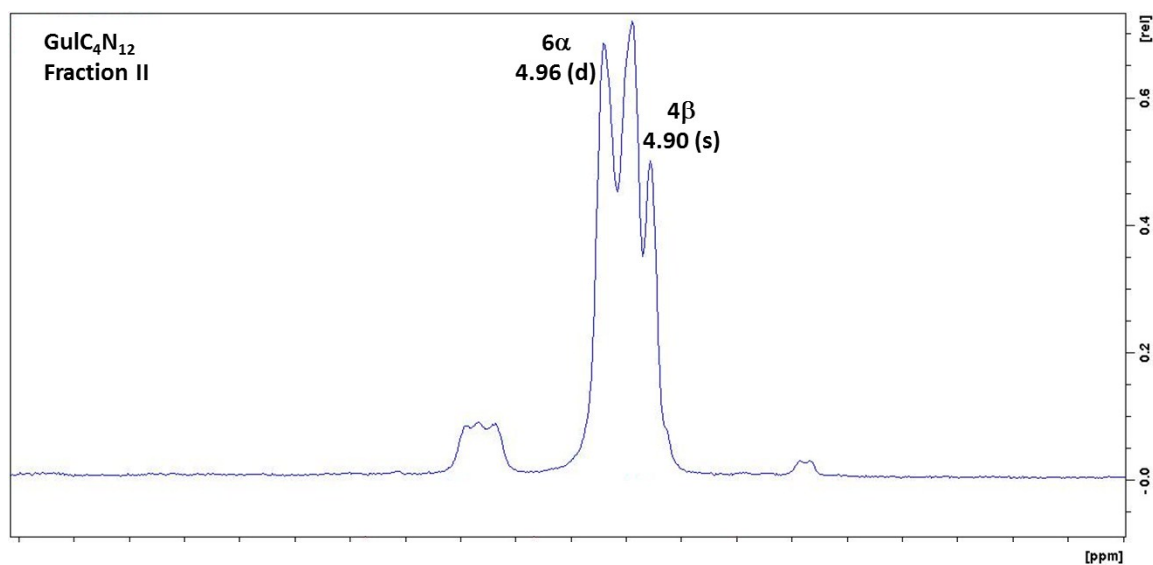

Fig.4b

**Fig.5**  $^{13}\text{C}$  (JMod) NMR spectrum ( $\text{CDCl}_3$ ) of a **Fraction II** enriched in isomer **6 $\alpha$** ,  $\alpha$ -L-Gulp, (major product) and isomer **4 $\beta$** ,  $\beta$ -L-Gulp (minor product), isolated after silica gel column chromatography of the **GulC<sub>4</sub>N<sub>12</sub>** composition. In Fig.5a, full spectrum; in Fig.5b, zoom of the anomeric  $^{13}\text{C}$  area.

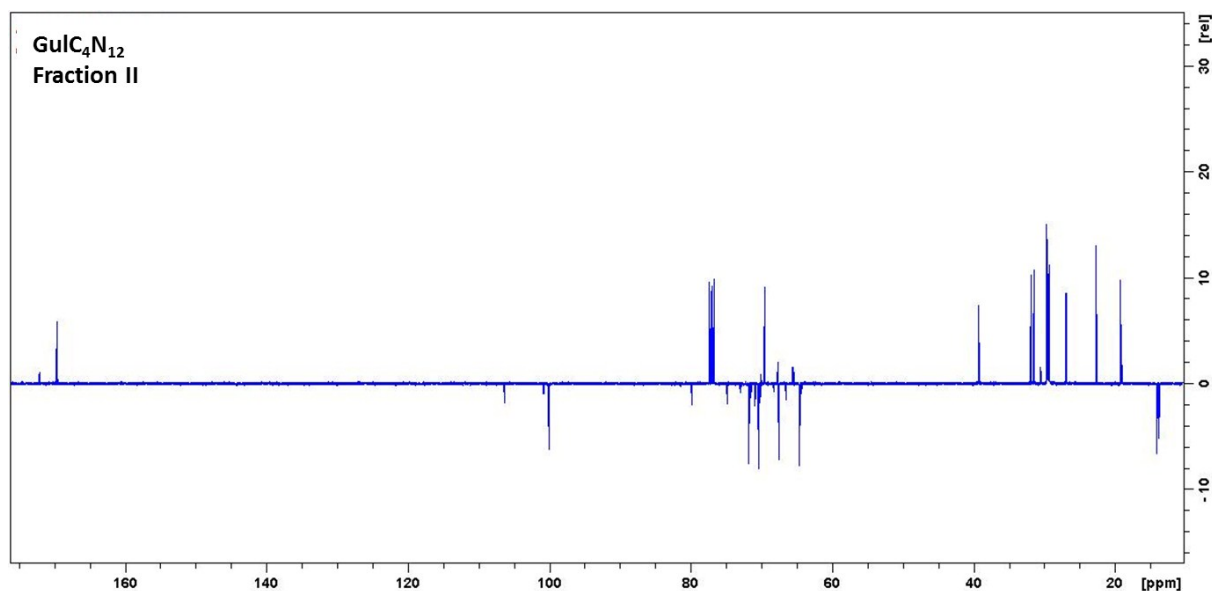

Fig.5a

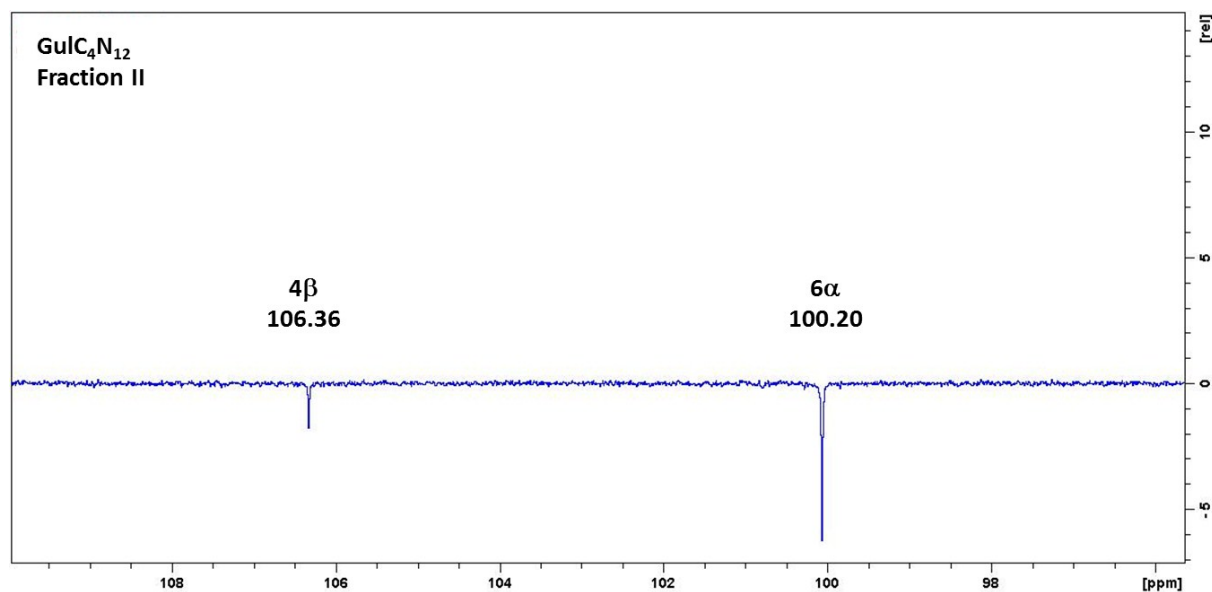

Fig.5b

**Fig.6**  $^1\text{H}$  NMR spectrum ( $\text{CDCl}_3$ ) of a **Fraction III** enriched in isomer **6 $\beta$** ,  $\beta$ -L-Gulp, isolated after silica gel column chromatography of the **GulC<sub>4</sub>N<sub>12</sub>** composition. In Fig.6a, full spectrum; in Fig.6b, zoom of the anomeric  $^1\text{H}$  area.

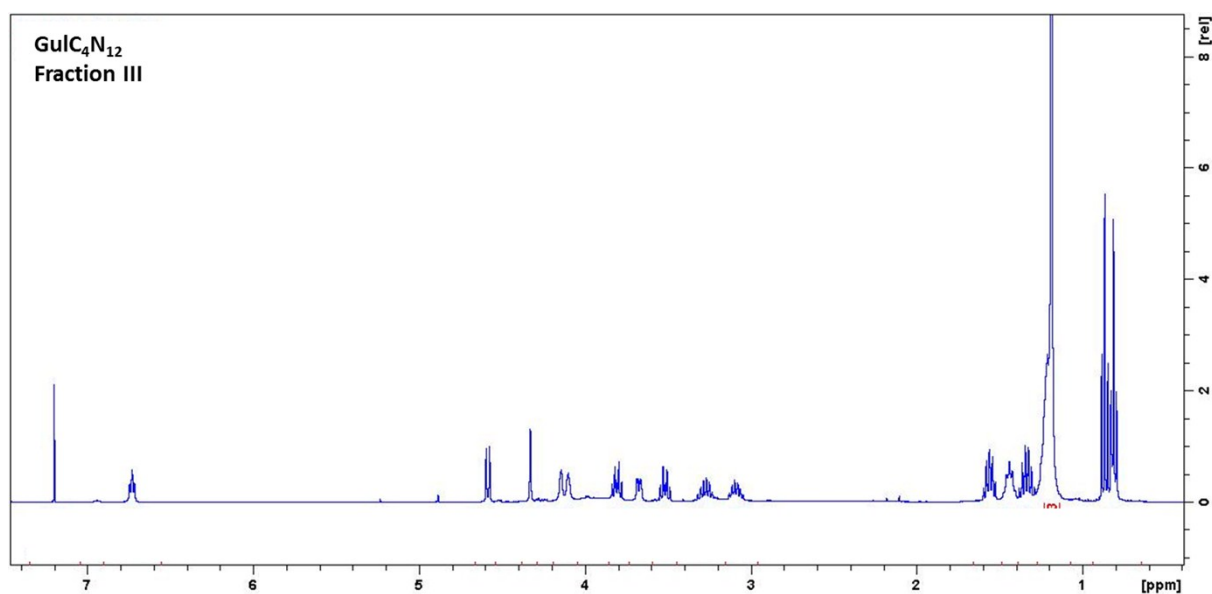

Fig.6a

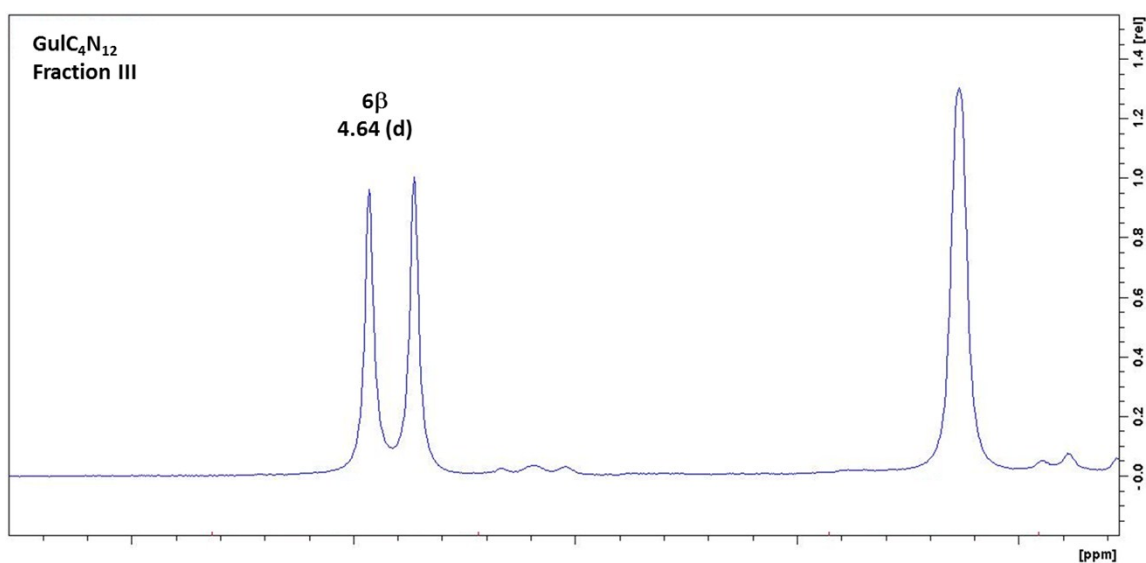

Fig.6b

**Fig.7**  $^{13}\text{C}$  (JMod) NMR spectrum ( $\text{CDCl}_3$ ) of a **Fraction III** enriched in isomer **6 $\beta$** ,  $\beta$ -L-Gulp, isolated after silica gel column chromatography of the **GulC<sub>4</sub>N<sub>12</sub>** composition. In Fig.7a, full spectrum; in Fig.7b, zoom of the anomeric  $^{13}\text{C}$  area.

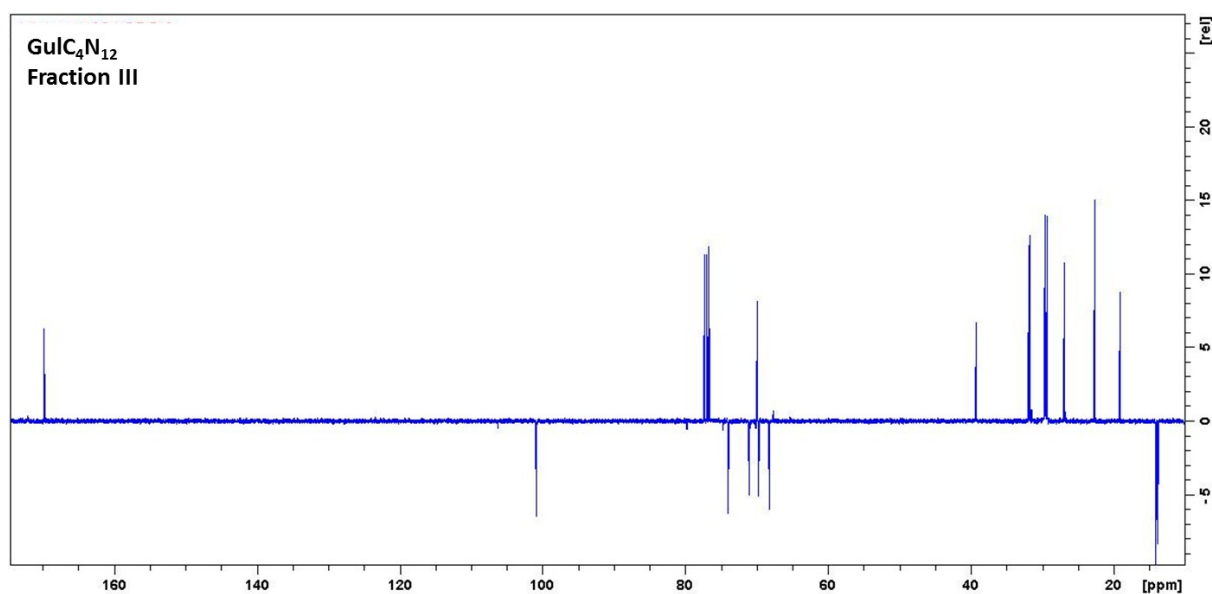

Fig.7a

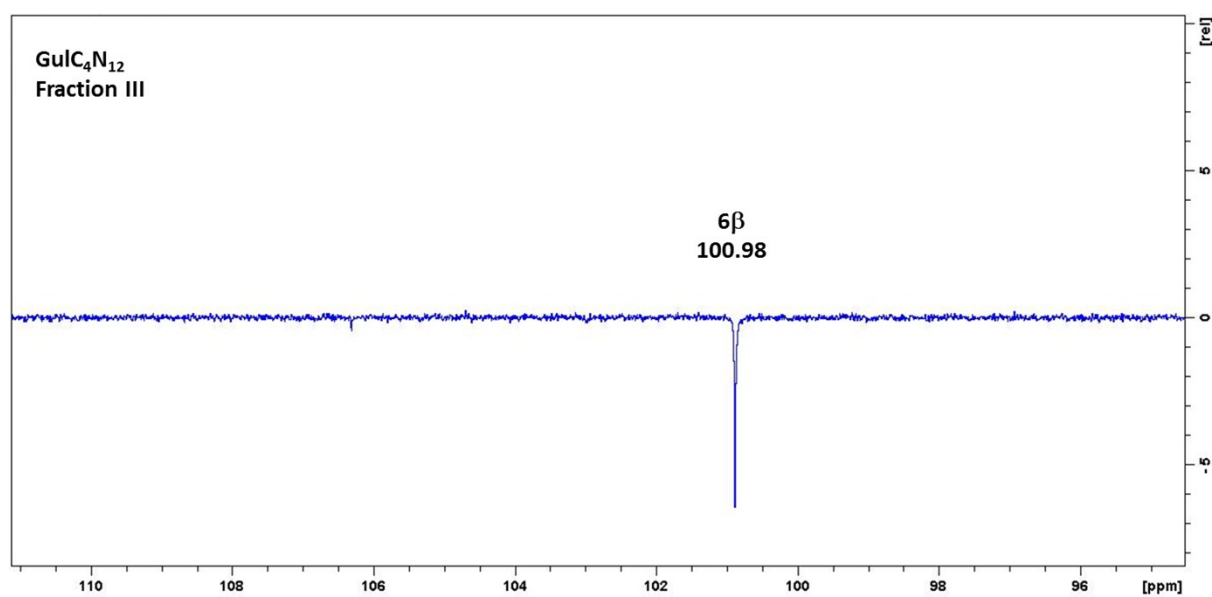

Fig.7b



**Fig.8**  $^1\text{H}$  NMR spectrum ( $\text{CDCl}_3$ ) of a **Fraction I** enriched enriched in isomer **5 $\alpha$** ,  $\alpha$ -L-Gulf (major product) and isomer **5 $\beta$** ,  $\beta$ -L-Gulf (minor product), isolated after silica gel column chromatography of the **GulC<sub>4</sub>N<sub>18</sub>** composition. In Fig.8a, full spectrum; in Fig.8b, zoom of the anomeric  $^1\text{H}$  area.

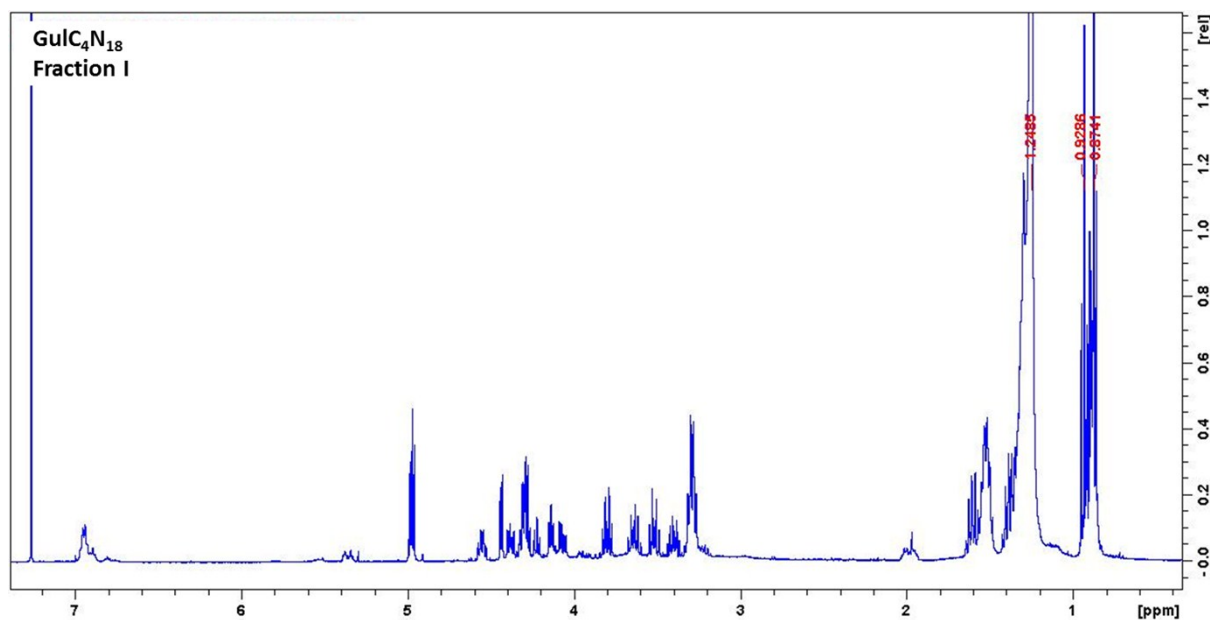

Fig.8a

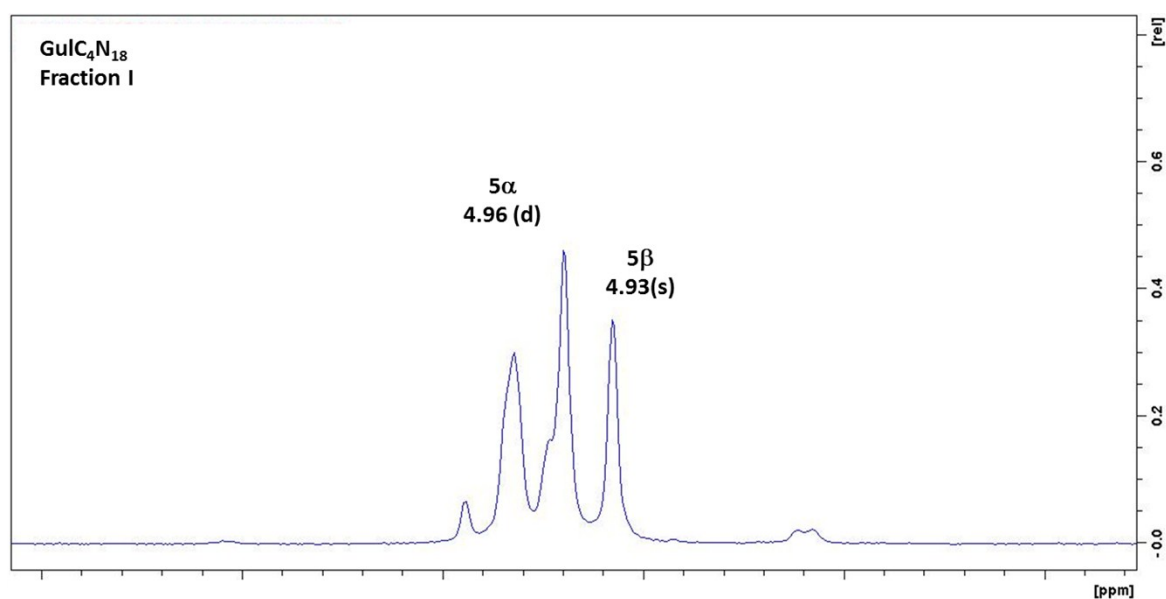

Fig.8b

**Fig.9**  $^{13}\text{C}$  (JMod) NMR spectrum ( $\text{CDCl}_3$ ) of a **Fraction I** enriched in isomer **5 $\alpha$** ,  $\alpha$ -L-Gulf (major product) and isomer **5 $\beta$** ,  $\beta$ -L-Gulf (minor product), isolated after silica gel column chromatography of the **GulC<sub>4</sub>N<sub>18</sub>** composition. In Fig.9a, full spectrum; in Fig.9b, zoom of the anomeric  $^{13}\text{C}$  area.

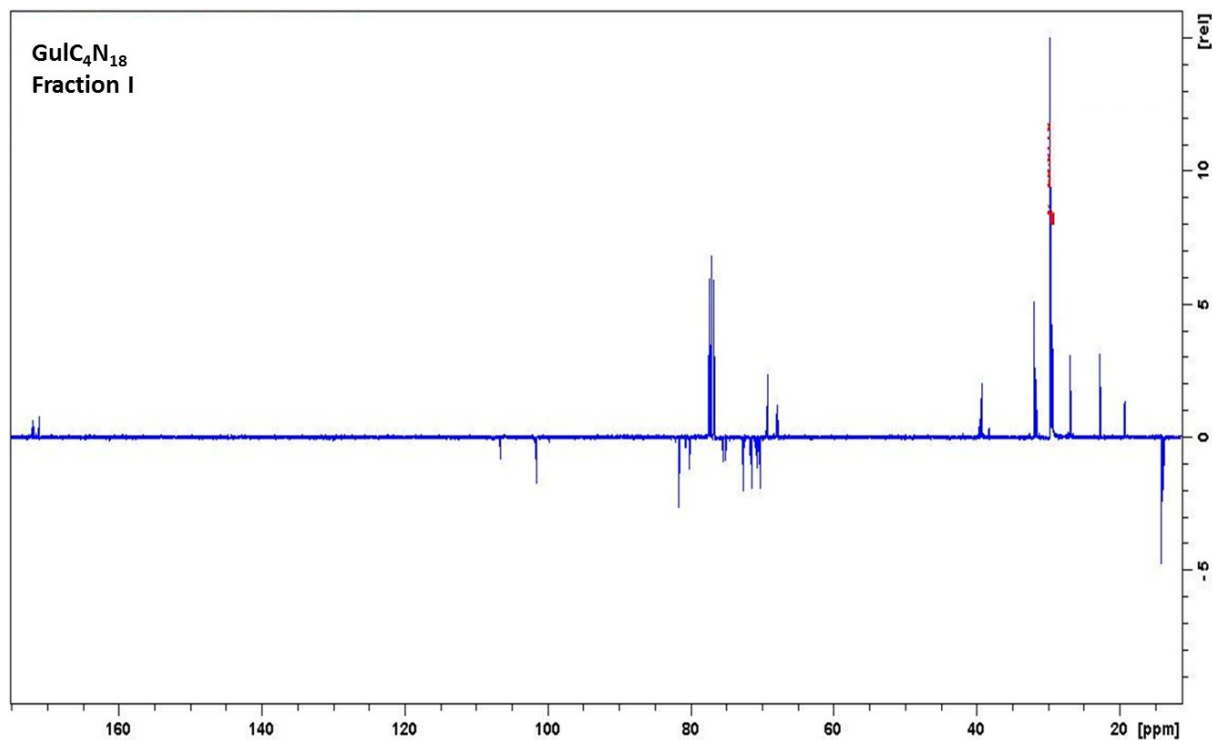

Fig.9a

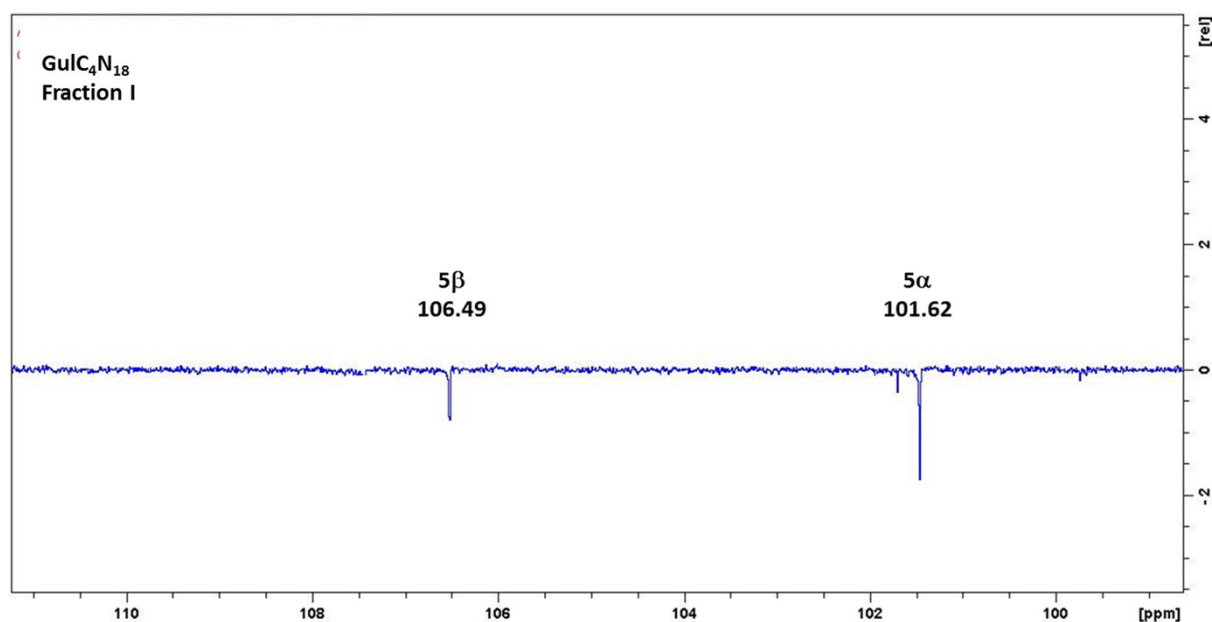

Fig.9b

**Fig.10**  $^1\text{H}$  NMR spectrum ( $\text{CDCl}_3$ ) of a **Fraction II** enriched in isomer **7 $\alpha$** ,  $\alpha$ -L-Gulp, (major product) and isomers **5 $\beta$** ,  $\beta$ -L-Gulp and **7 $\beta$** ,  $\beta$ -L-Gulp (minor products), isolated after silica gel column chromatography of the **GulC<sub>4</sub>N<sub>18</sub>** composition. In Fig.10a, full spectrum; in Fig.10b, zoom of the anomeric  $^1\text{H}$  area.

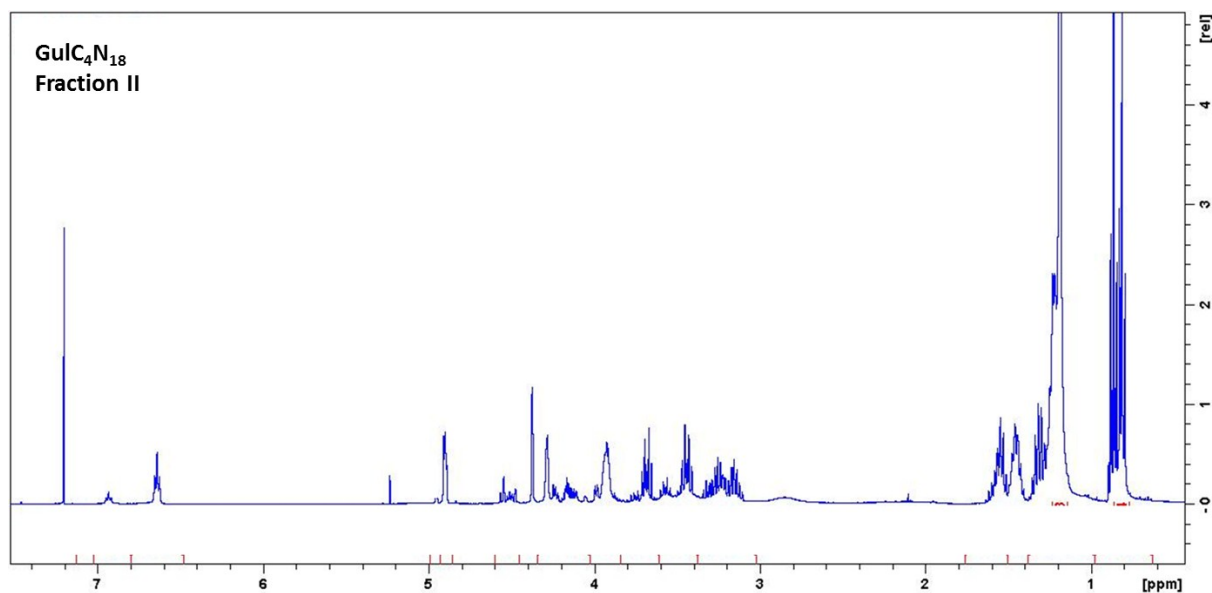

Fig.10a

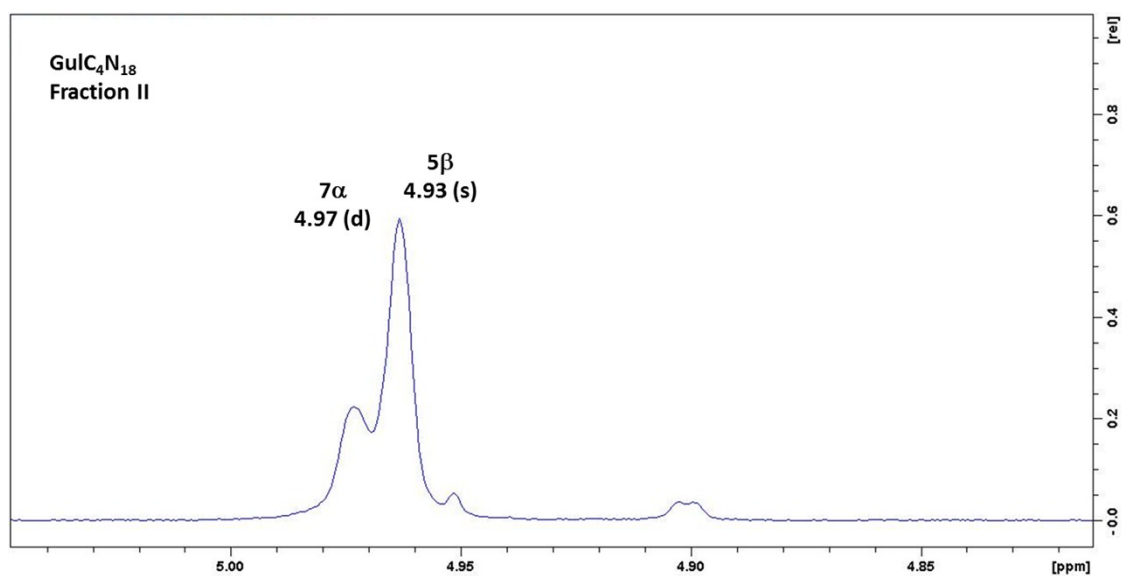

Fig.10b

**Fig.11**  $^{13}\text{C}$  (JMod) NMR spectrum ( $\text{CDCl}_3$ ) of a **Fraction II** enriched in isomer **7 $\alpha$** ,  $\alpha$ -L-Gulp, (major product) and isomers **5 $\beta$** ,  $\beta$ -L-Gulp and **7 $\beta$** ,  $\beta$ -L-Gulp (minor products), isolated after silica gel column chromatography of the **GulC<sub>4</sub>N<sub>18</sub>** composition. In Fig.11a, full spectrum; in Fig.11b, zoom of the anomeric  $^{13}\text{C}$  area.

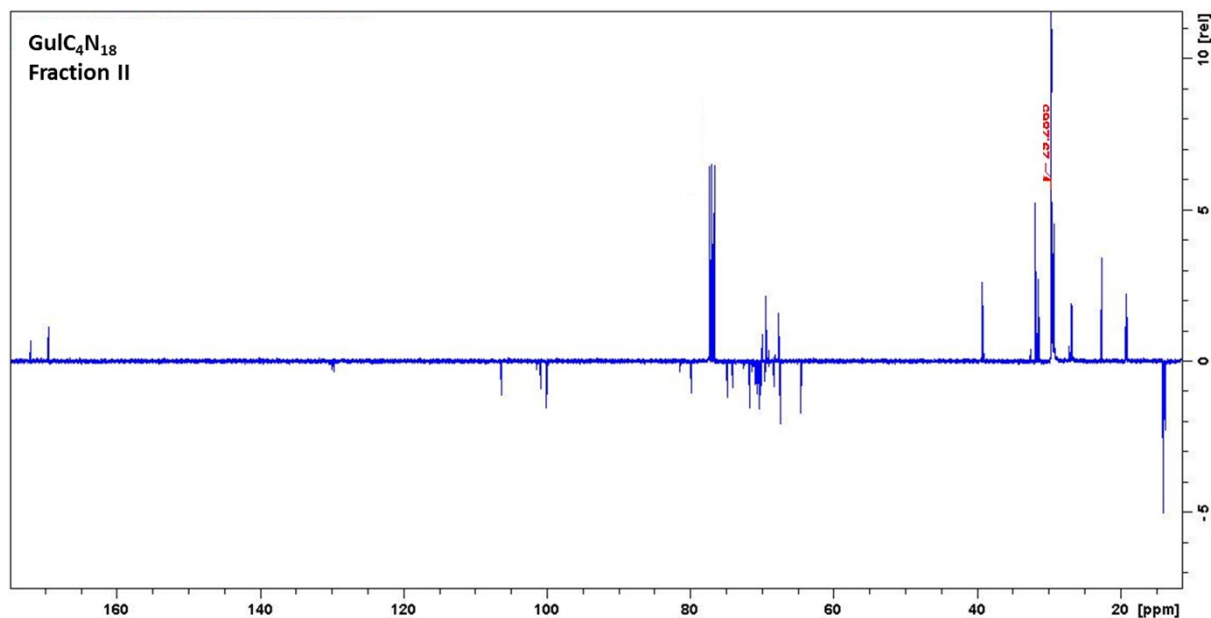

Fig.11a

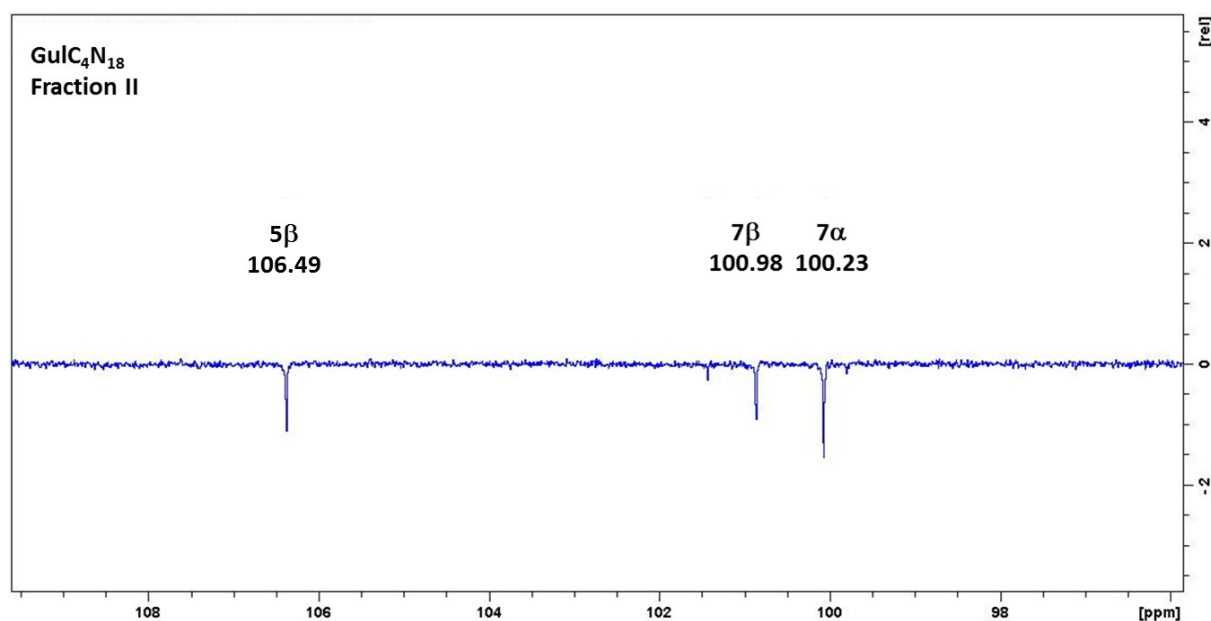

Fig.11b

**Fig.12**  $^1\text{H}$  NMR spectrum ( $\text{CDCl}_3$ ) of a **Fraction III** enriched in isomer **7 $\beta$** ,  $\beta$ -L-Gulp, isolated after silica gel column chromatography of the **GulC<sub>4</sub>N<sub>18</sub>** composition. In Fig.12a, full spectrum; in Fig.12b, zoom of the anomeric  $^1\text{H}$  area.

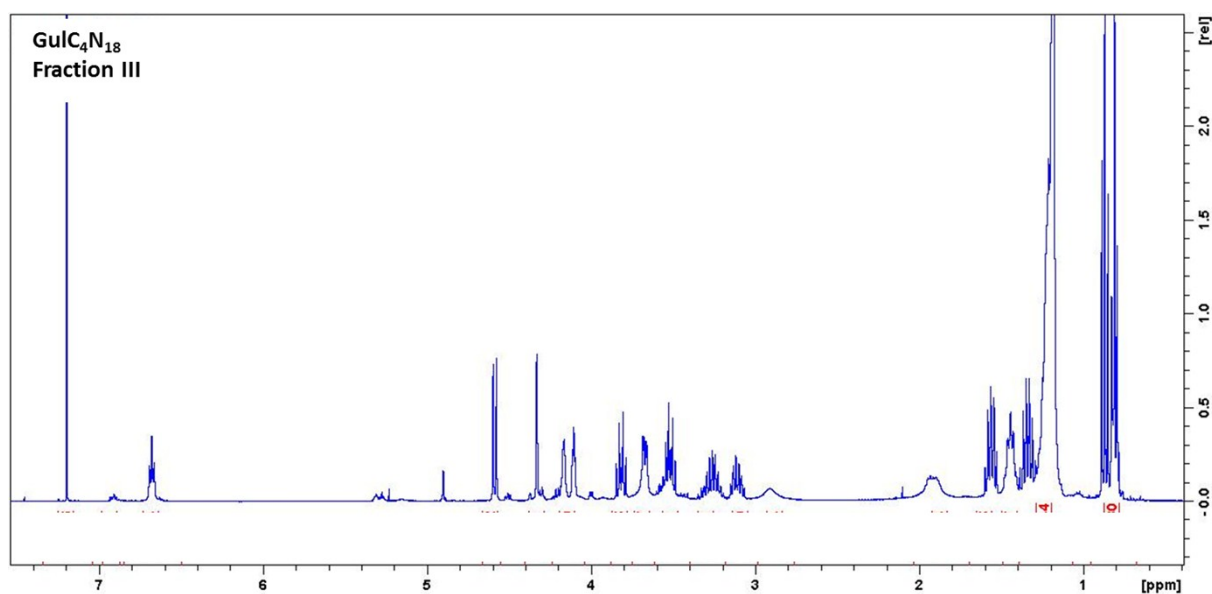

Fig.12a

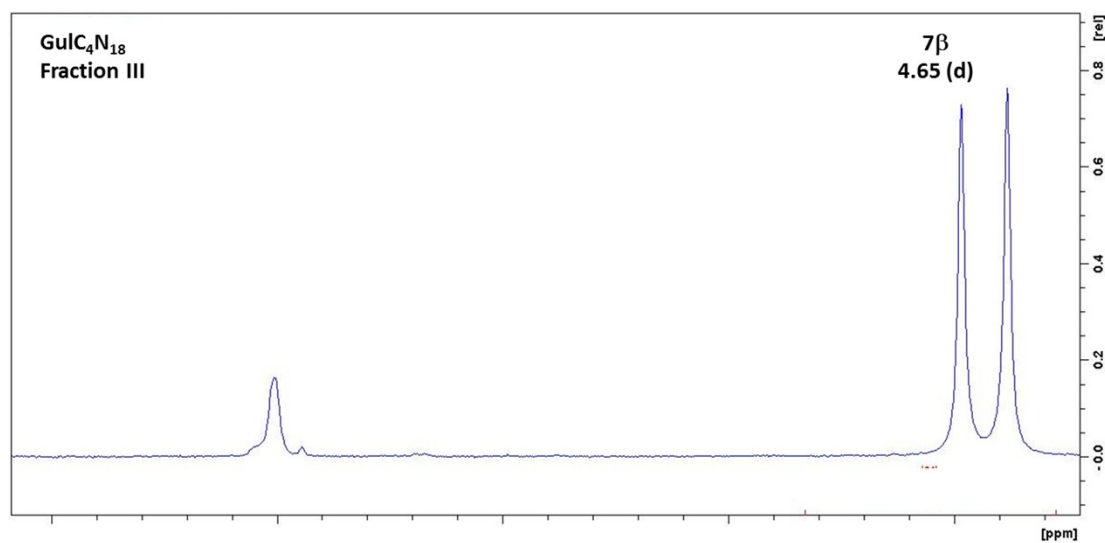

Fig.12b

**Fig.13**  $^{13}\text{C}$  (JMod) NMR spectrum ( $\text{CDCl}_3$ ) of a **Fraction III** enriched in isomer **7 $\beta$** ,  $\beta$ -L-Gulp, isolated after silica gel column chromatography of the **GulC<sub>4</sub>N<sub>18</sub>** composition. In Fig.13a, full spectrum; in Fig.13b, zoom of the anomeric  $^{13}\text{C}$  area.

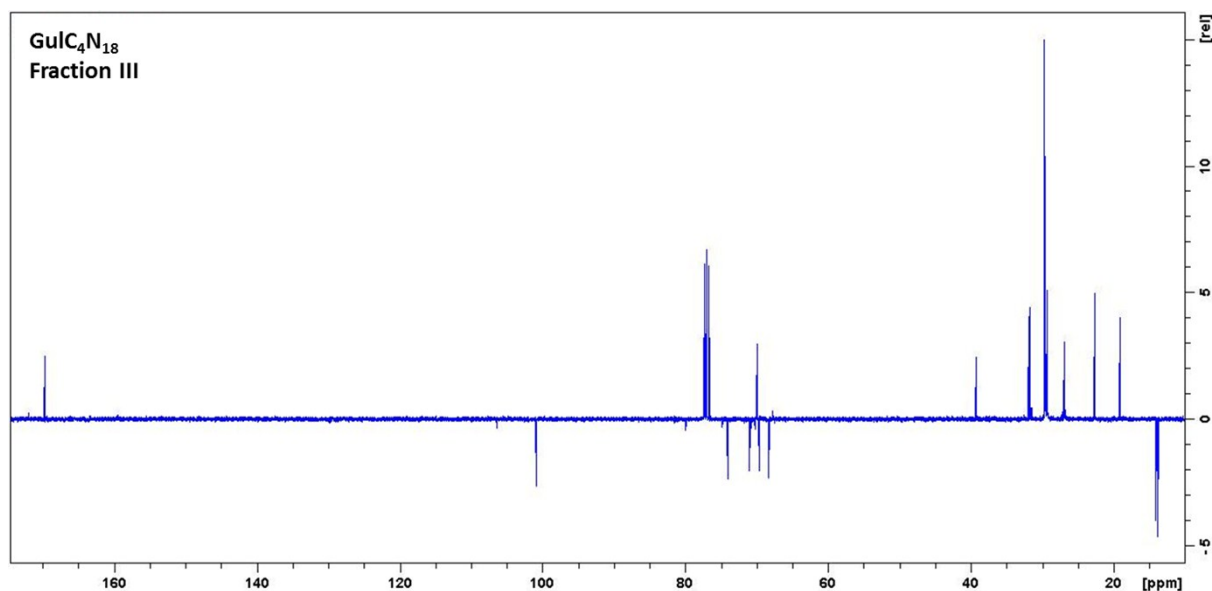

Fig.13a

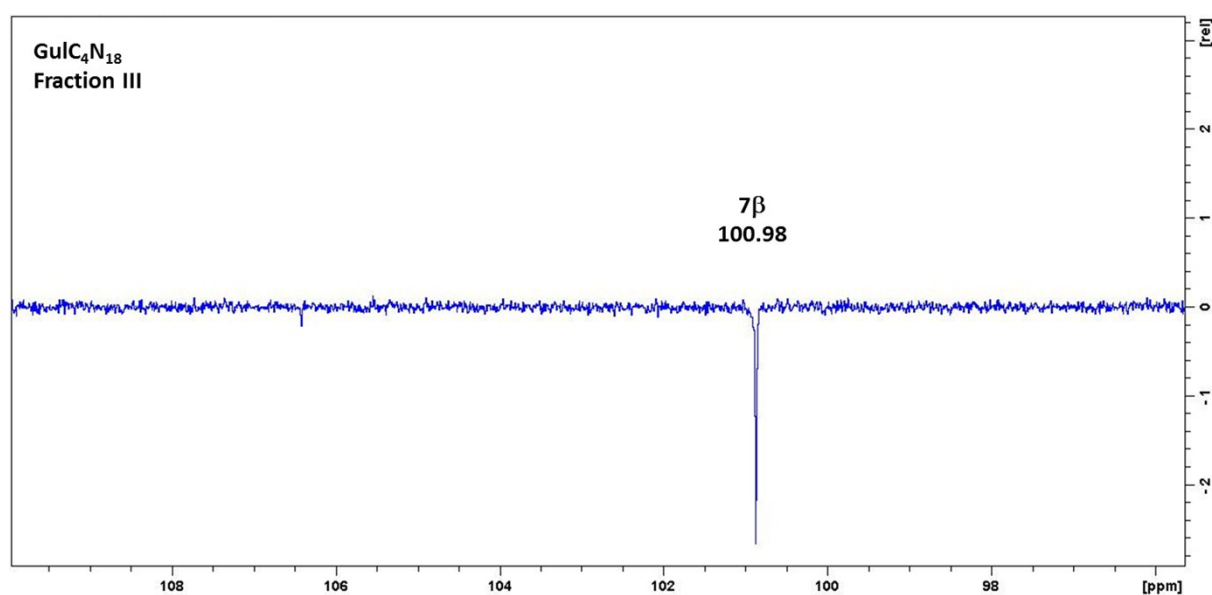

Fig.13b

**Fig.14**  $^1\text{H}$  NMR spectrum ( $\text{CDCl}_3$ ) of a **Fraction I** enriched in isomer **8 $\alpha$** ,  $\alpha$ -D-Manf (major product) and isomer **4 $\alpha$** ,  $\alpha$ -L-Gulf (minor product), isolated after silica gel column chromatography of the **AlgC<sub>4</sub>N<sub>12</sub>** composition. In Fig.14a, full spectrum; in Fig.14b, zoom of the anomeric  $^1\text{H}$  area.

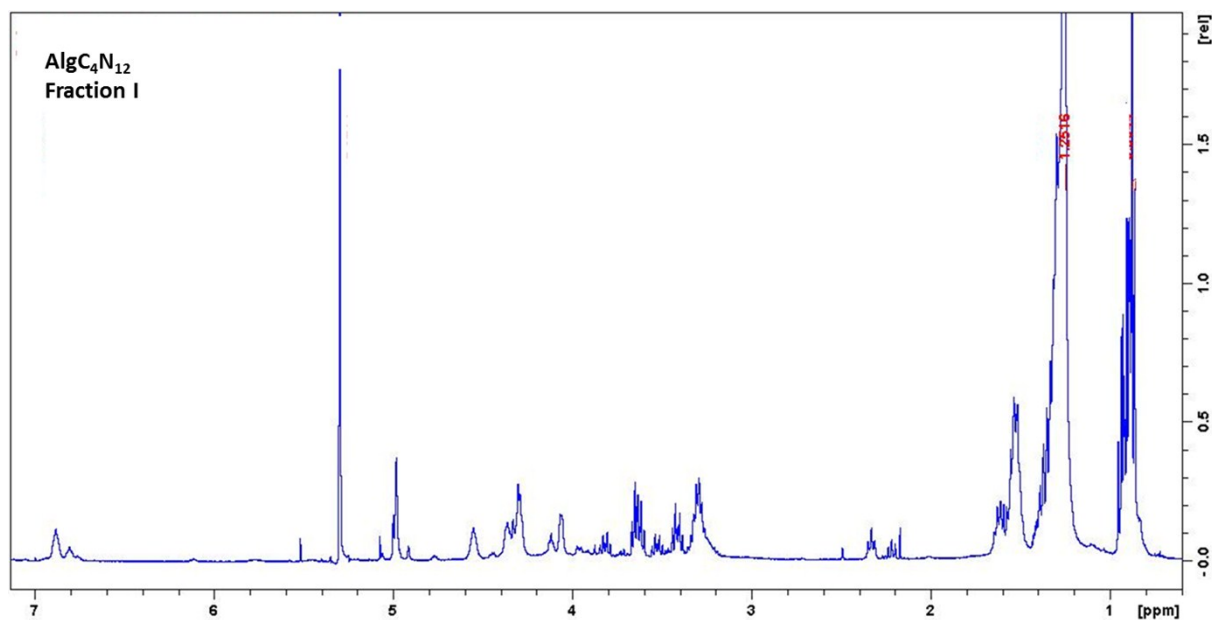

Fig.14a

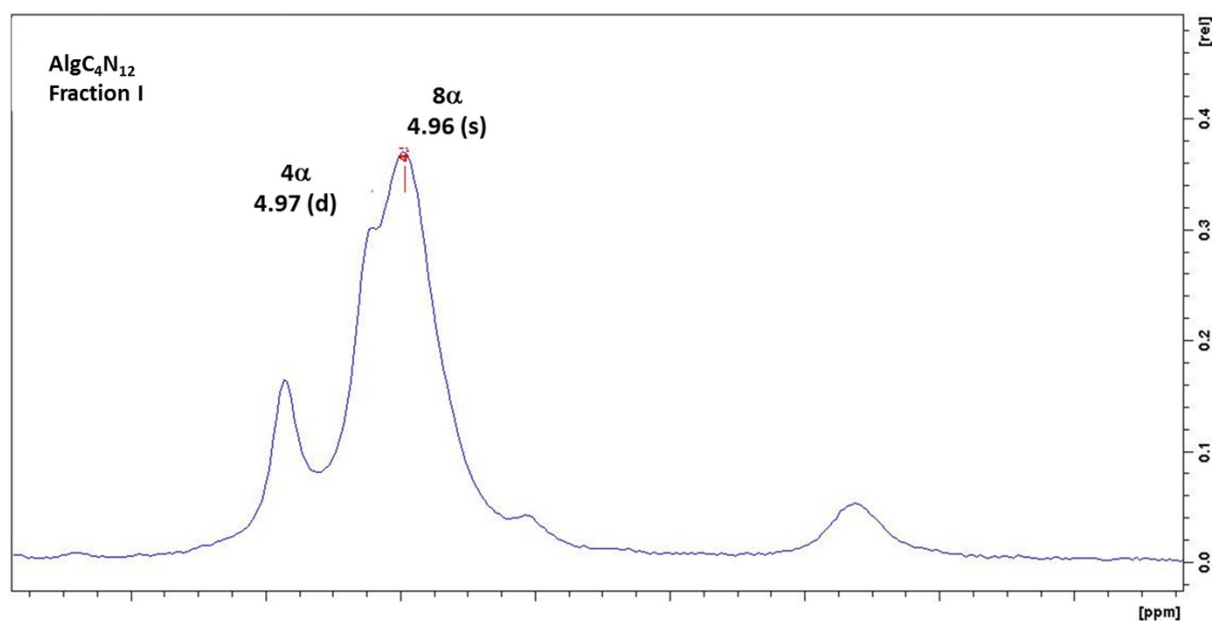

Fig.14b

**Fig.15**  $^{13}\text{C}$  (JMod) NMR spectrum ( $\text{CDCl}_3$ ) of a **Fraction I** enriched in isomer **8 $\alpha$** ,  $\alpha$ -D-Manf (major product) and isomer **4 $\alpha$** ,  $\alpha$ -L-Gulf (minor product), isolated after silica gel column chromatography of the **AlgC<sub>4</sub>N<sub>12</sub>** composition. In Fig.15a, full spectrum; in Fig.15b, zoom of the anomeric  $^{13}\text{C}$  area.

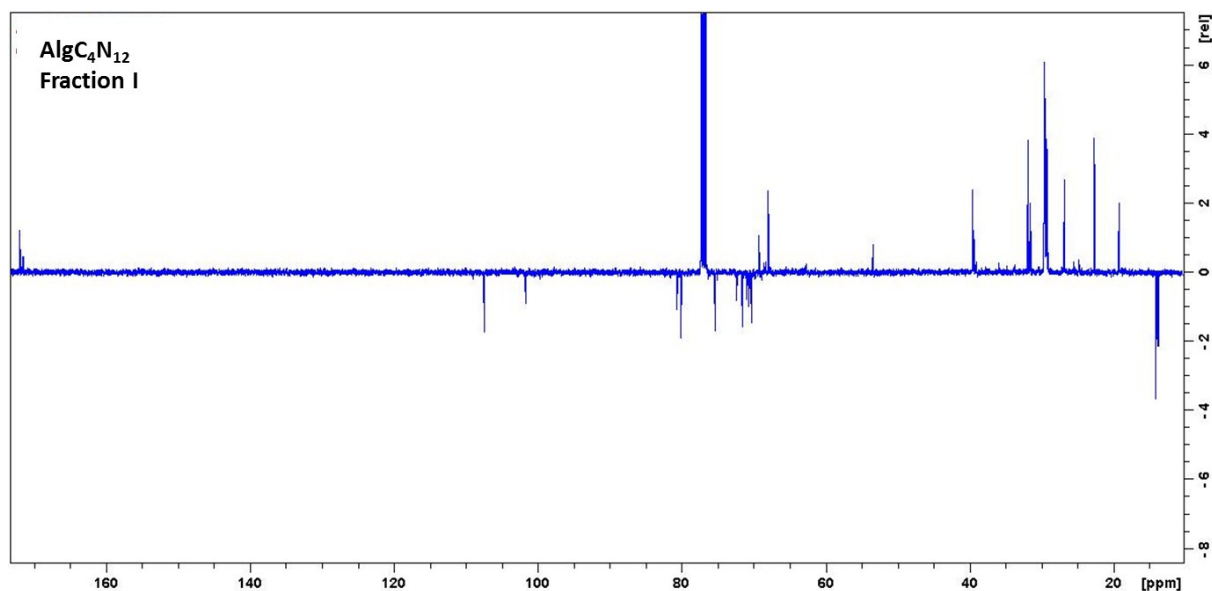

Fig.15a

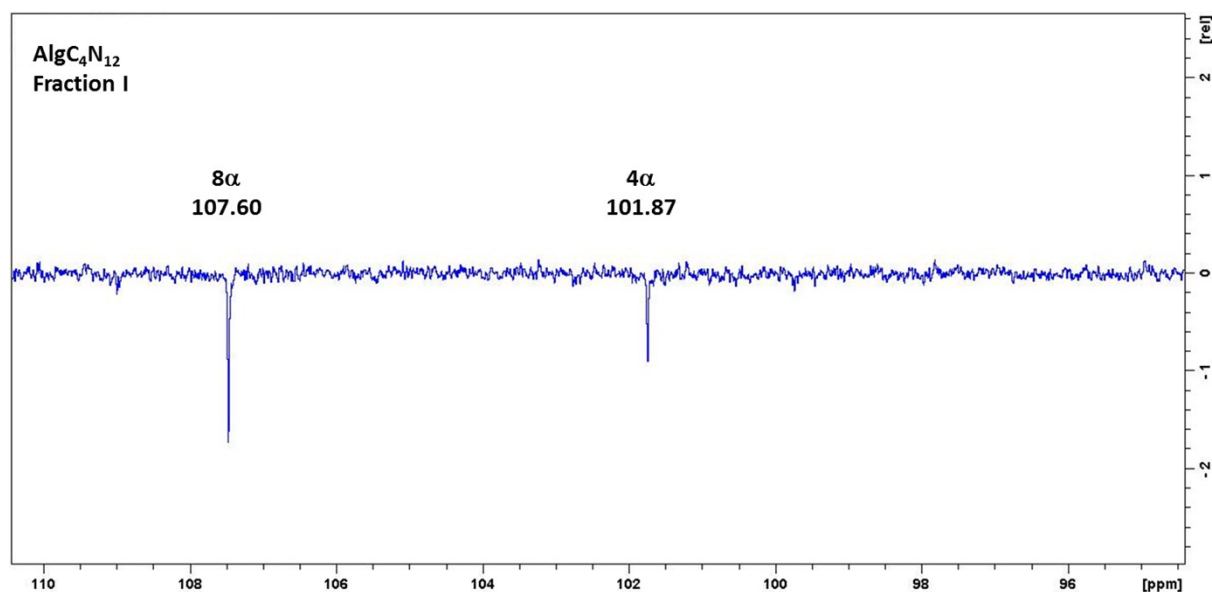

Fig.15b



**Fig.16**  $^1\text{H}$  NMR spectrum ( $\text{CDCl}_3$ ) of a **Fraction II** enriched in isomer **4 $\beta$** ,  $\beta$ -L-Gulf (major product) and isomers **4 $\alpha$** ,  $\alpha$ -L-Gulf and **10 $\alpha$** ,  $\alpha$ -D-Manp (minor products), isolated after silica gel column chromatography of the **AlgC<sub>4</sub>N<sub>12</sub>** composition. In Fig.16a, full spectrum; in Fig.16b, zoom of the anomeric  $^1\text{H}$  area.

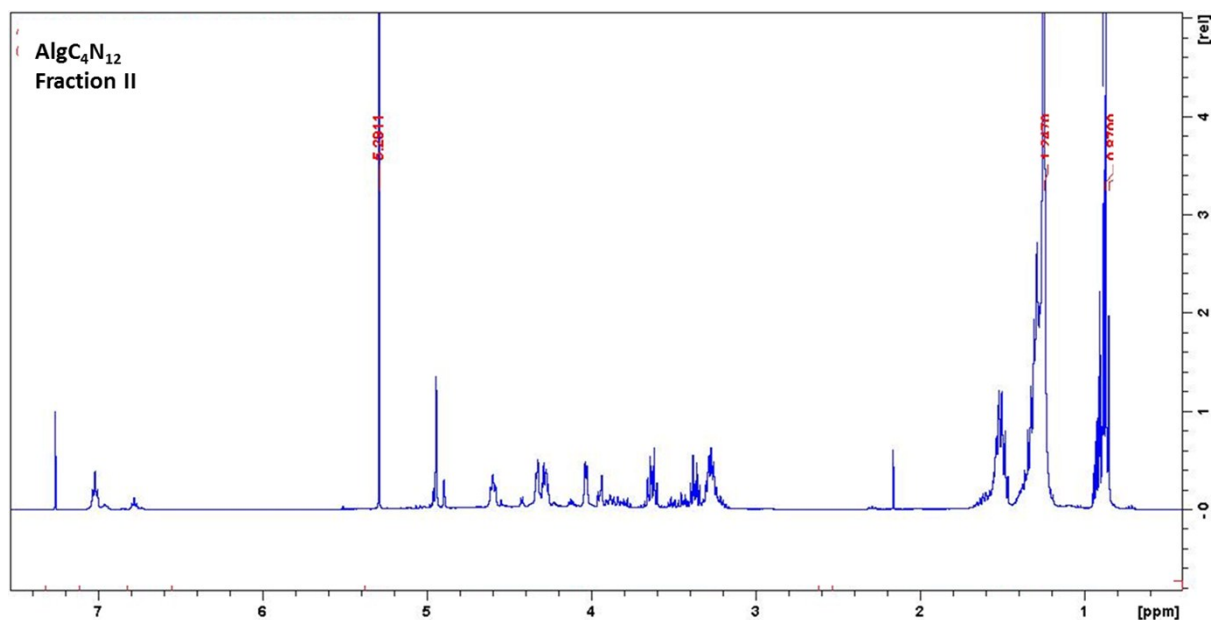

Fig.16a

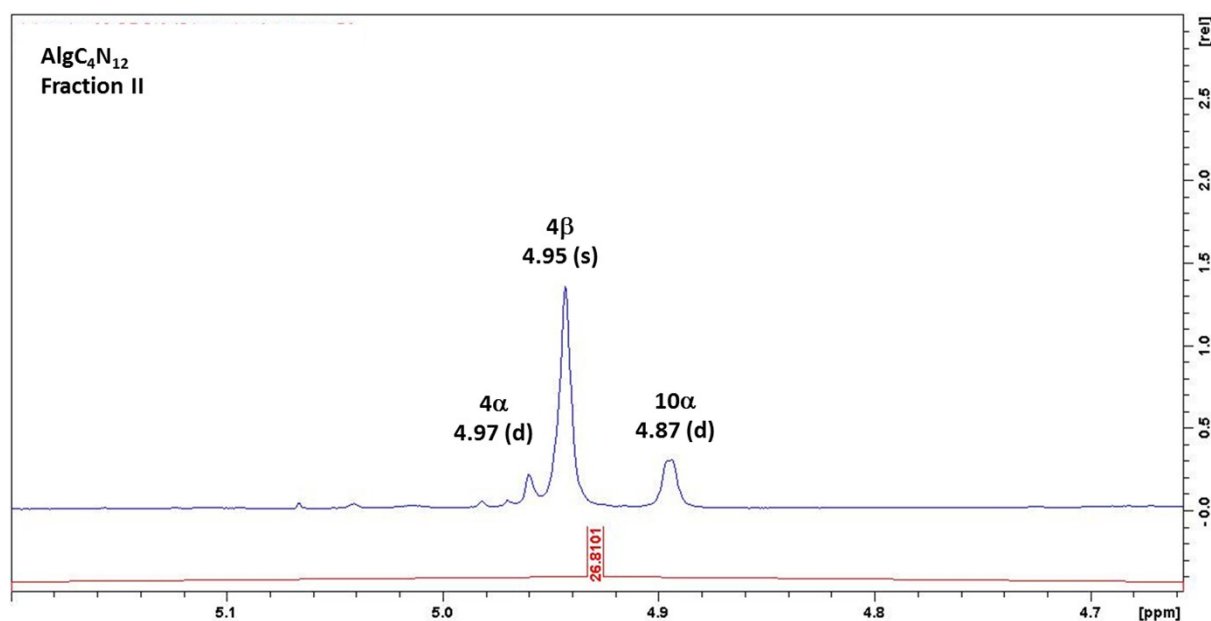

Fig.16b

**Fig.17**  $^{13}\text{C}$  (JMod) NMR spectrum ( $\text{CDCl}_3$ ) of a **Fraction II** enriched in isomer **4 $\beta$** ,  $\beta$ -L-Gulf (major product) and isomers **4 $\alpha$** ,  $\alpha$ -L-Gulf and **10 $\alpha$** ,  $\alpha$ -D-Manp (minor products), isolated after silica gel column chromatography of the **AlgC<sub>4</sub>N<sub>12</sub>** composition. In Fig.17a, full spectrum; in Fig.17b, zoom of the anomeric  $^{13}\text{C}$  area.

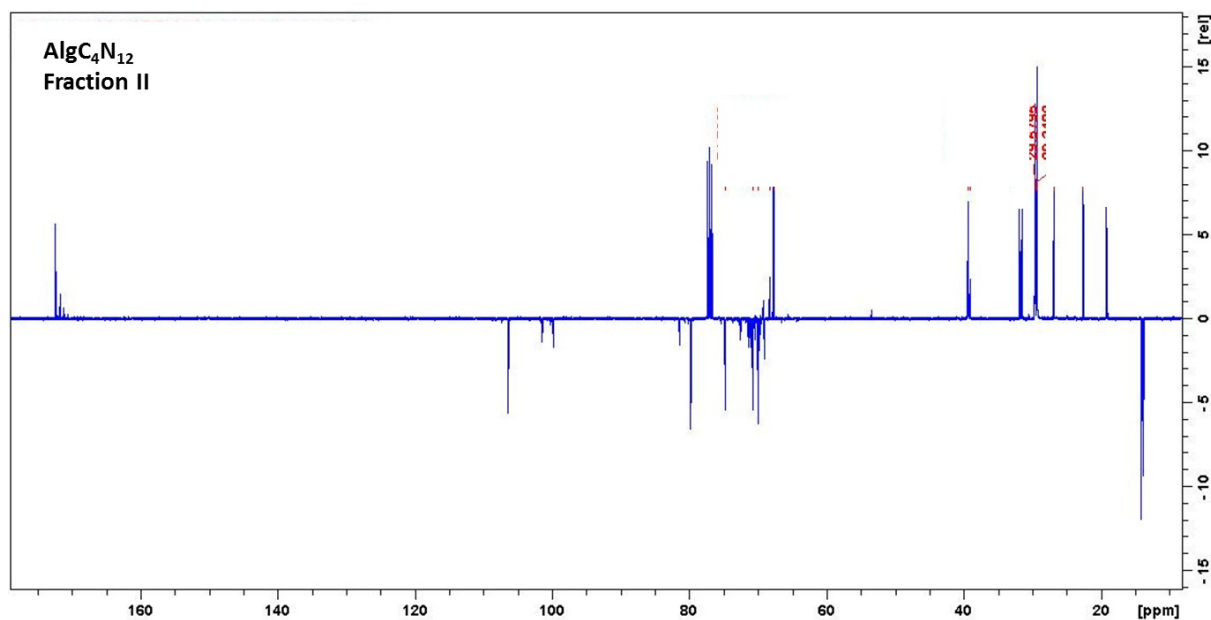

Fig.17a

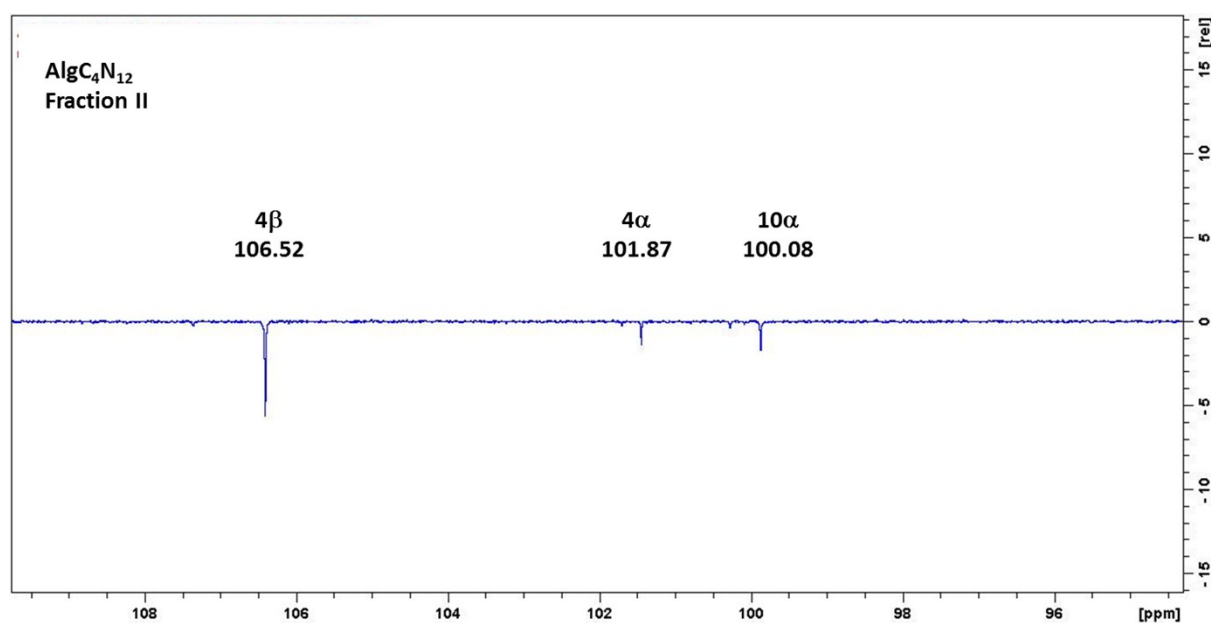

Fig.17b

**Fig.18**  $^1\text{H}$  NMR spectrum ( $\text{CDCl}_3$ ) of a **Fraction III** enriched in isomer **6 $\alpha$** ,  $\alpha$ -L-Gulp isolated after silica gel column chromatography of the **AlgC<sub>4</sub>N<sub>12</sub>** composition. In Fig.18a, full spectrum; in Fig.18b, zoom of the anomeric  $^1\text{H}$  area.

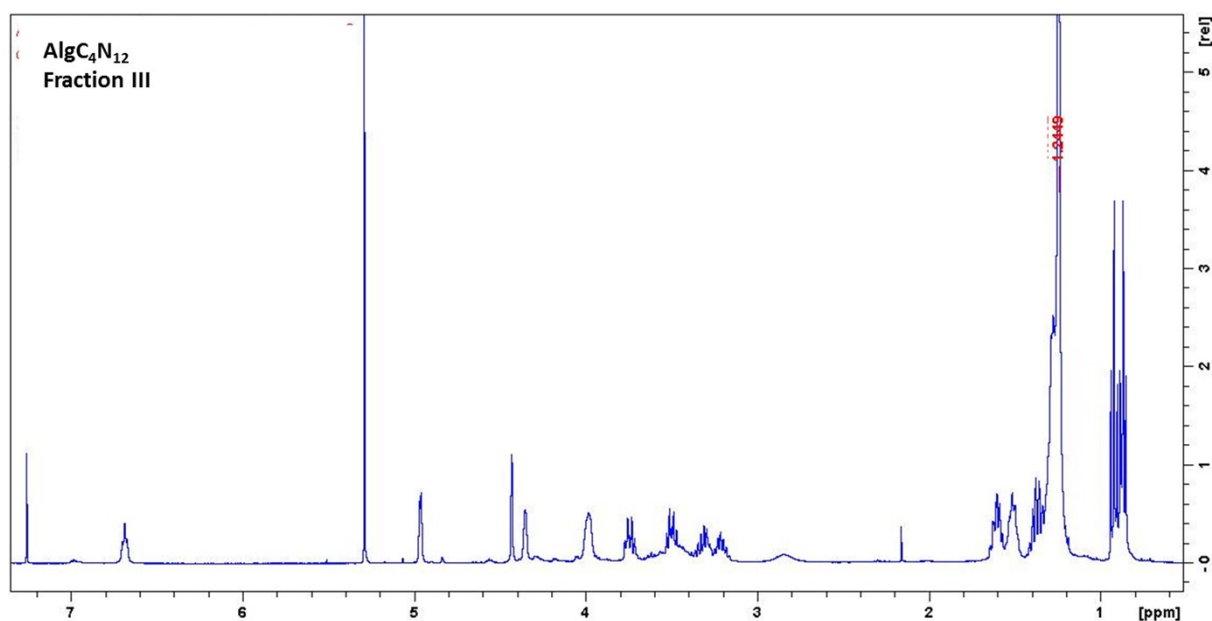

Fig.18a

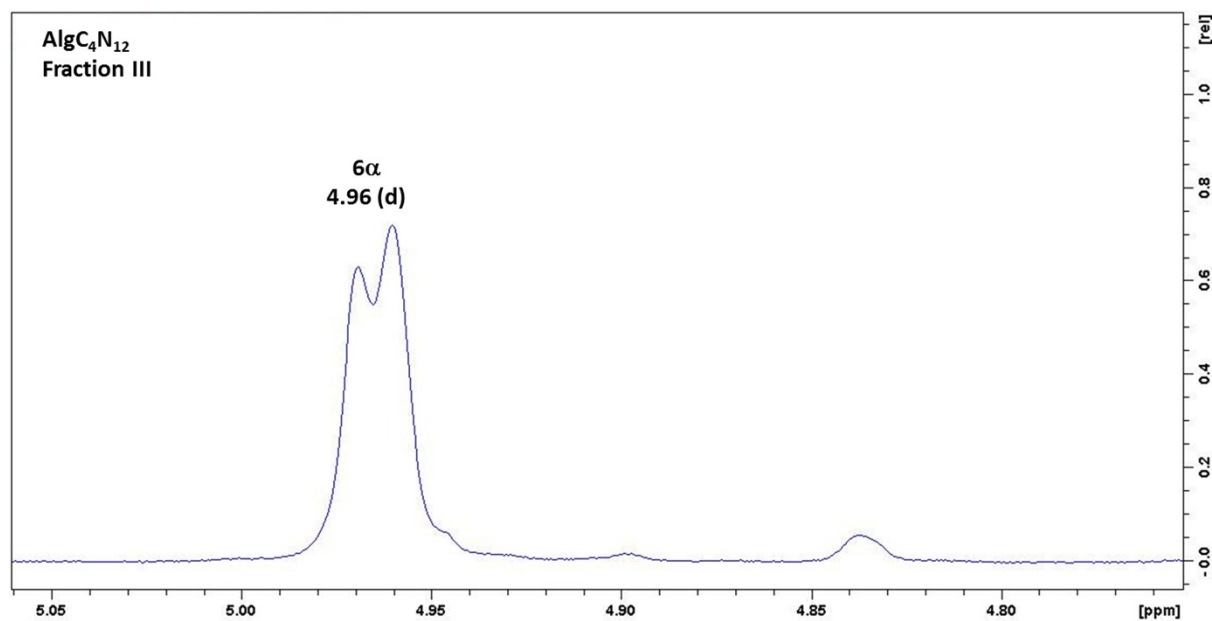

Fig.18b

**Fig.19**  $^{13}\text{C}$  (JMod) NMR spectrum ( $\text{CDCl}_3$ ) of a **Fraction III** enriched in isomer **6 $\alpha$** ,  $\alpha$ -L-Gulp isolated after silica gel column chromatography of the **AlgC<sub>4</sub>N<sub>12</sub>** composition. In Fig.19a, full spectrum; in Fig.19b, zoom of the anomeric  $^{13}\text{C}$  area.

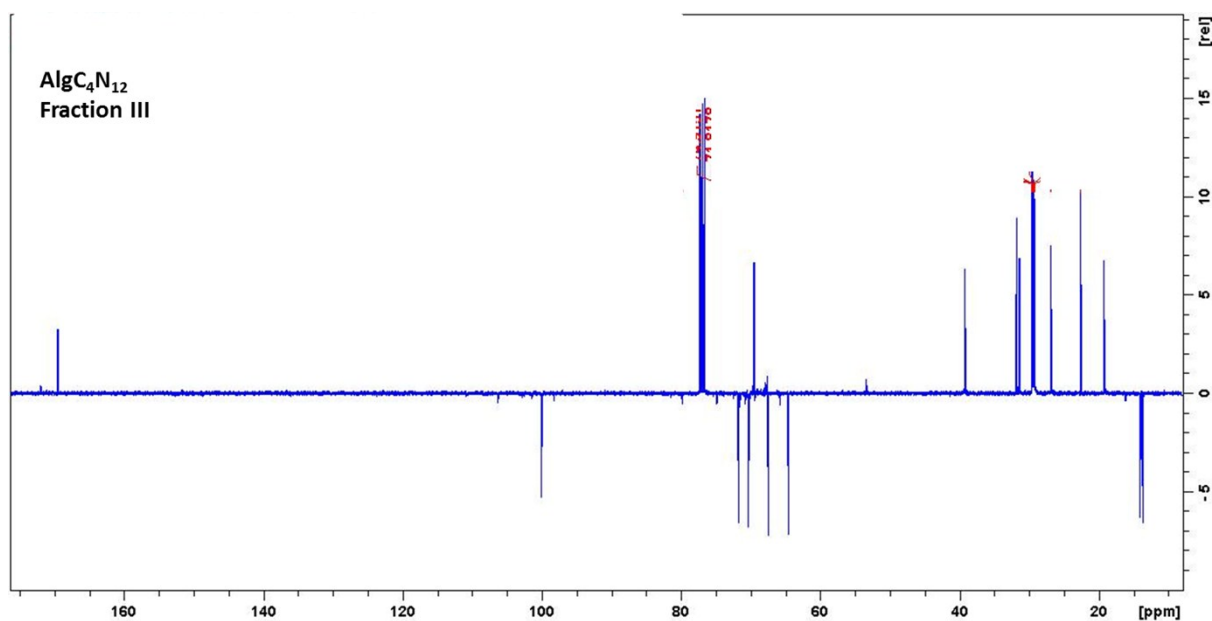

Fig.19a

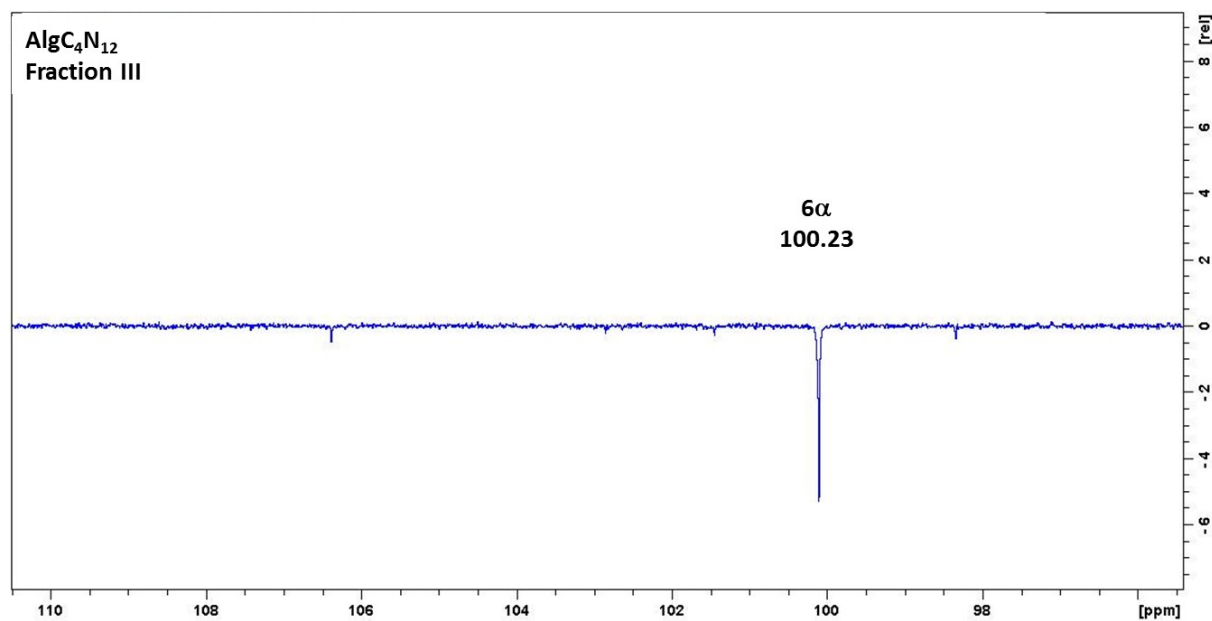

Fig.19b

**Fig.20**  $^1\text{H}$  NMR spectrum ( $\text{CDCl}_3$ ) of a **Fraction IV** enriched in isomer **6 $\beta$** ,  $\beta$ -L-Gulp isolated after silica gel column chromatography of the **AlgC<sub>4</sub>N<sub>12</sub>** composition. In Fig.20a, full spectrum; in Fig.20b, zoom of the anomeric  $^1\text{H}$  area.

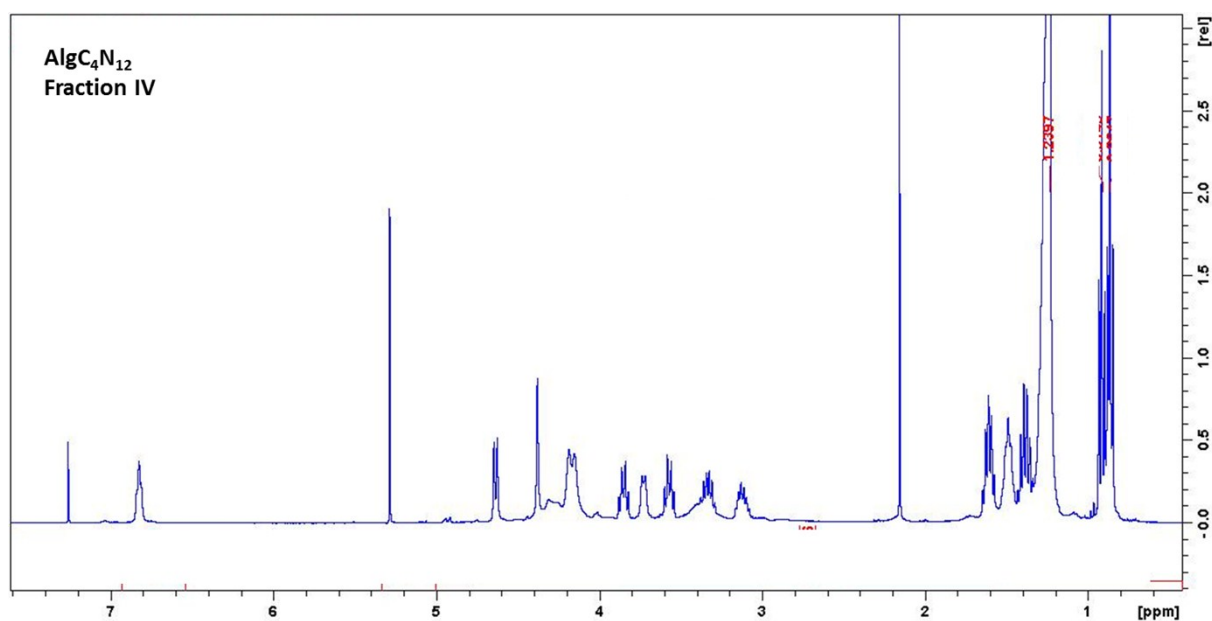

Fig.20a

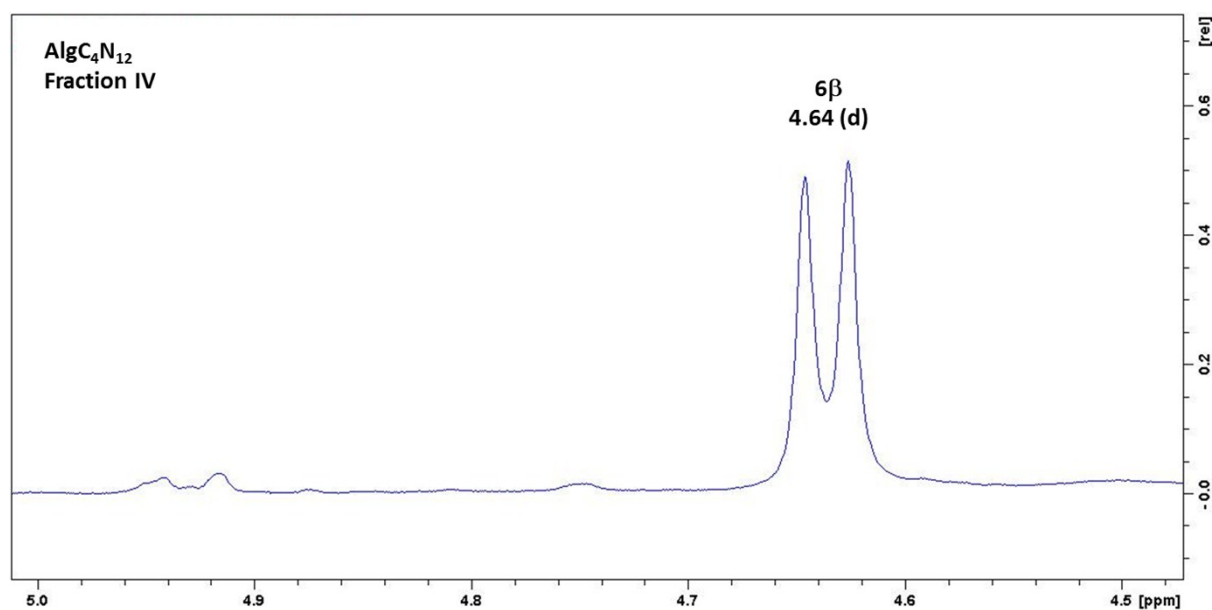

Fig.20b

**Fig.21**  $^{13}\text{C}$  (JMod) NMR spectrum ( $\text{CDCl}_3$ ) of a **Fraction IV** enriched in isomer **6 $\beta$** ,  $\beta$ -L-Gulp isolated after silica gel column chromatography of the **AlgC<sub>4</sub>N<sub>12</sub>** composition. In Fig.21a, full spectrum; in Fig.21b, zoom of the anomeric  $^{13}\text{C}$  area.

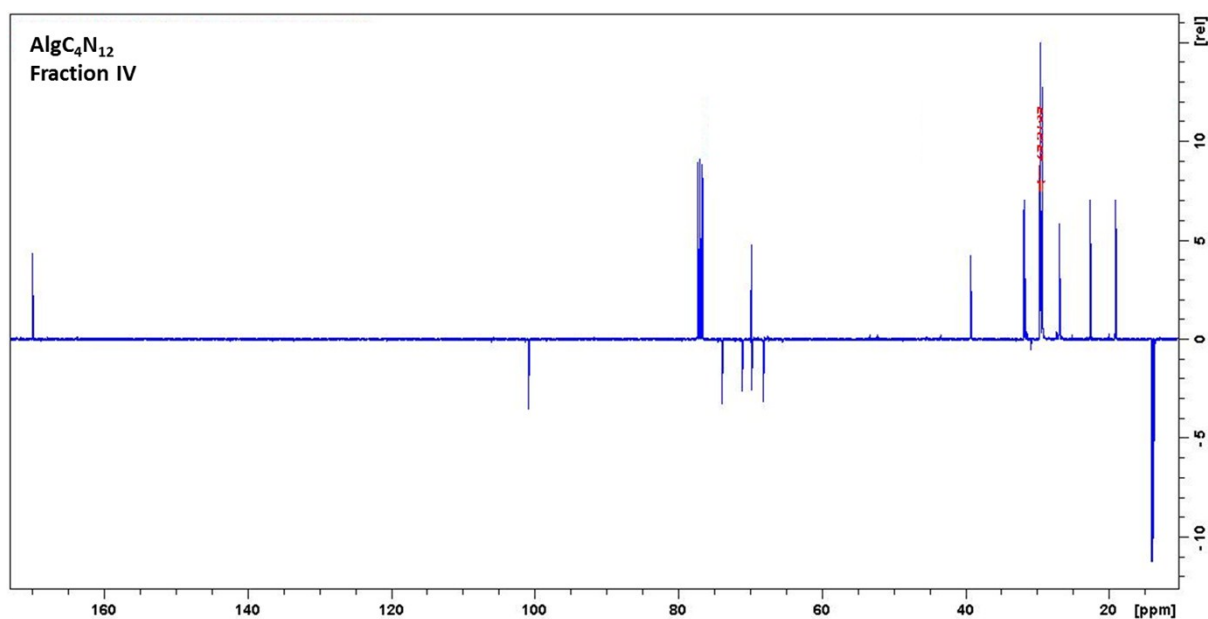

Fig.21a

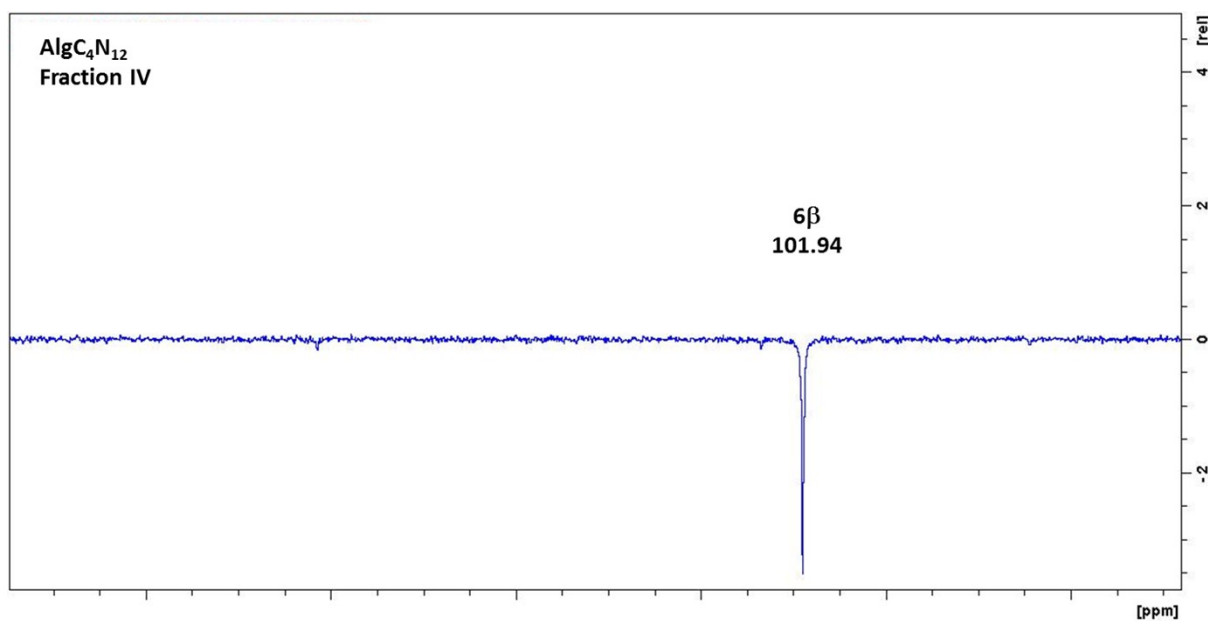

Fig.21b

**Fig.22**  $^1\text{H}$  NMR spectrum ( $\text{CDCl}_3$ ) of a **Fraction I** enriched in isomer **9 $\alpha$** ,  $\alpha$ -D-Manf (major product) and isomers **5 $\alpha$** ,  $\alpha$ -L-Gulf and **11 $\alpha$** ,  $\alpha$ -D-Manp (minor products), isolated after silica gel column chromatography of the **AlgC<sub>4</sub>N<sub>18</sub>** composition. In Fig.22a, full spectrum; in Fig.22b, zoom of the anomeric  $^1\text{H}$  area.

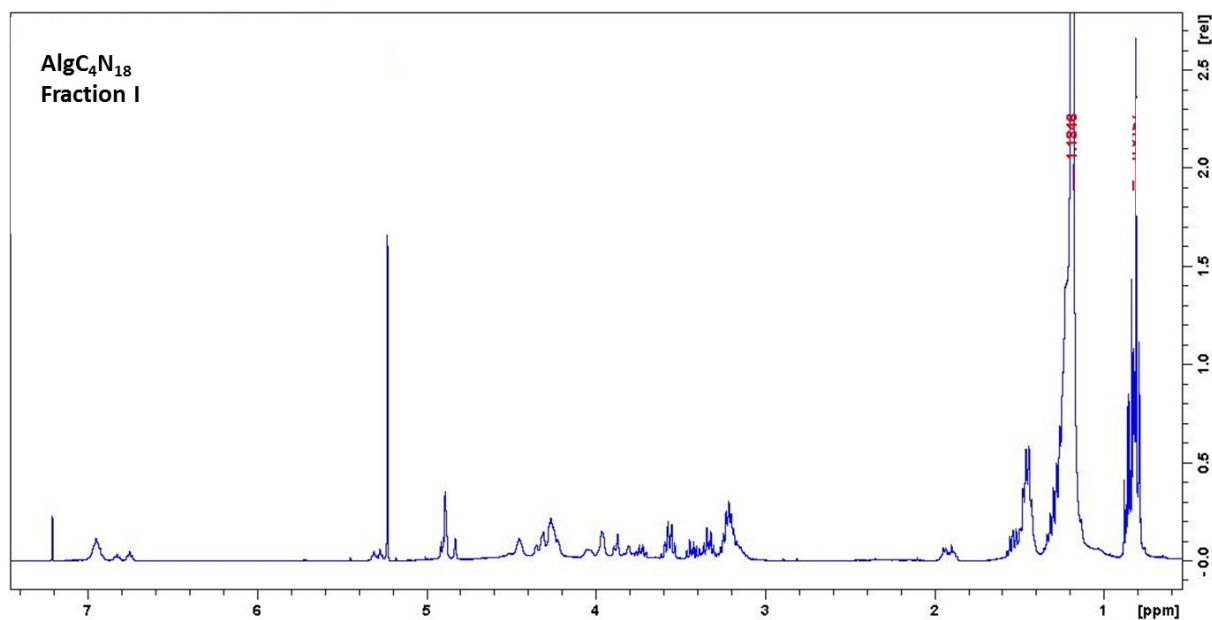

Fig.22a

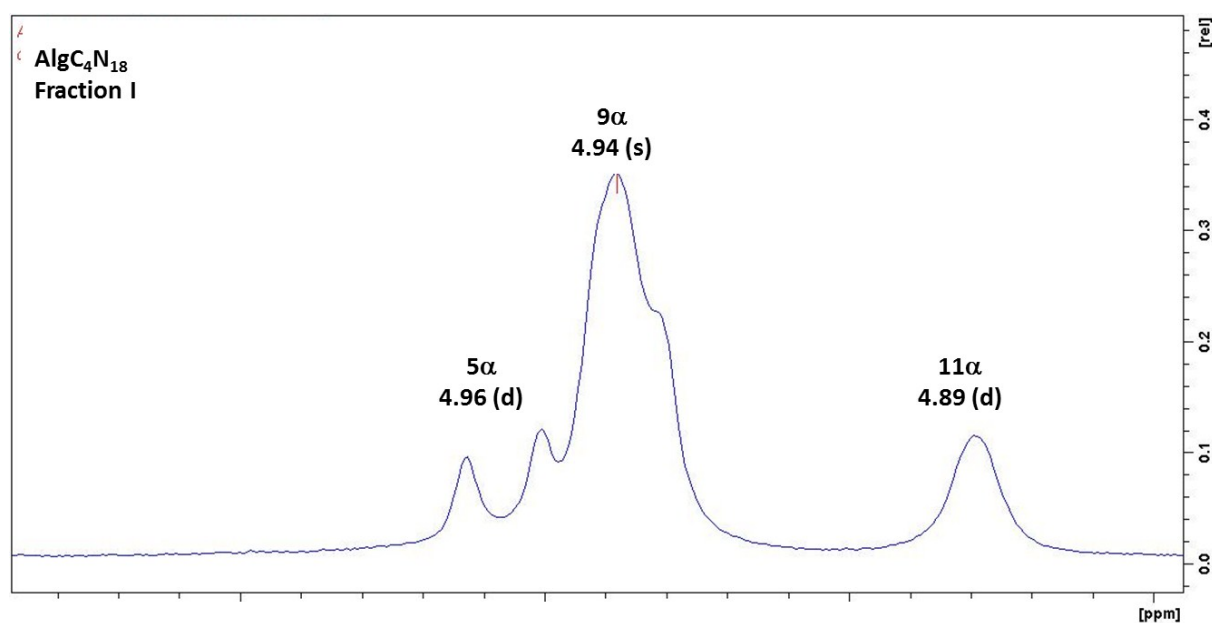

Fig.22b

**Fig.23**  $^{13}\text{C}$  (JMod) NMR spectrum ( $\text{CDCl}_3$ ) of a **Fraction I** enriched in isomer **9 $\alpha$** ,  $\alpha\text{-D-Manf}$  (major product) and isomers **5 $\alpha$** ,  $\alpha\text{-L-Gulf}$  and **11 $\alpha$** ,  $\alpha\text{-D-Manp}$  (minor products), isolated after silica gel column chromatography of the **AlgC<sub>4</sub>N<sub>18</sub>** composition. In Fig.23a, full spectrum; in Fig.23b, zoom of the anomeric  $^{13}\text{C}$  area.

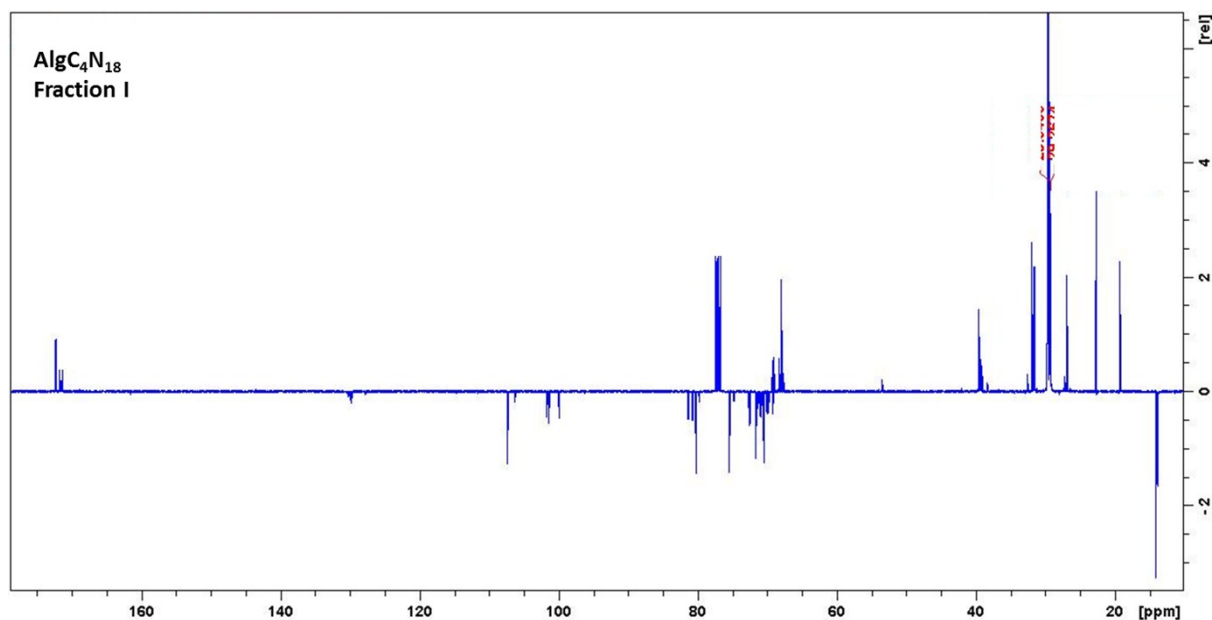

Fig.23a

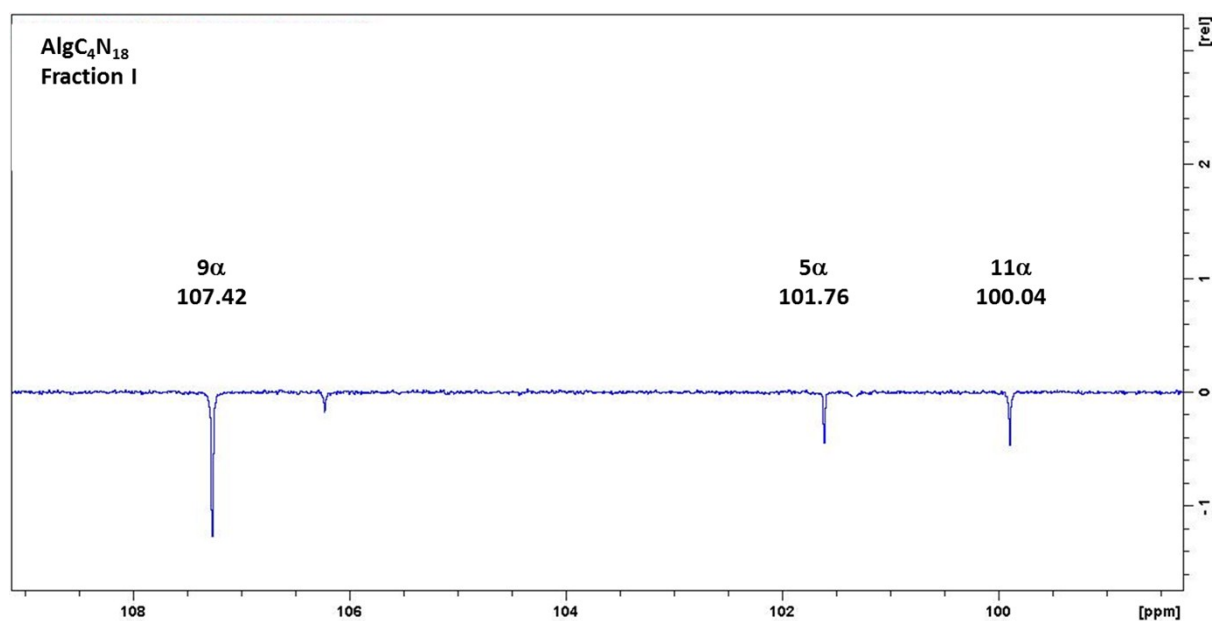

Fig.23b



**Fig.24**  $^1\text{H}$  NMR spectrum ( $\text{CDCl}_3$ ) of a **Fraction II** enriched in isomer **7 $\beta$** ,  $\beta$ -L-Gulp (major product) and isomers **7 $\alpha$** ,  $\alpha$ -L-Gulp and **5 $\beta$** ,  $\beta$ -L-Gulf (minor products), isolated after silica gel column chromatography of the **AlgC<sub>4</sub>N<sub>18</sub>** composition. In Fig.24a, full spectrum; in Fig.24b, zoom of the anomeric  $^1\text{H}$  area.

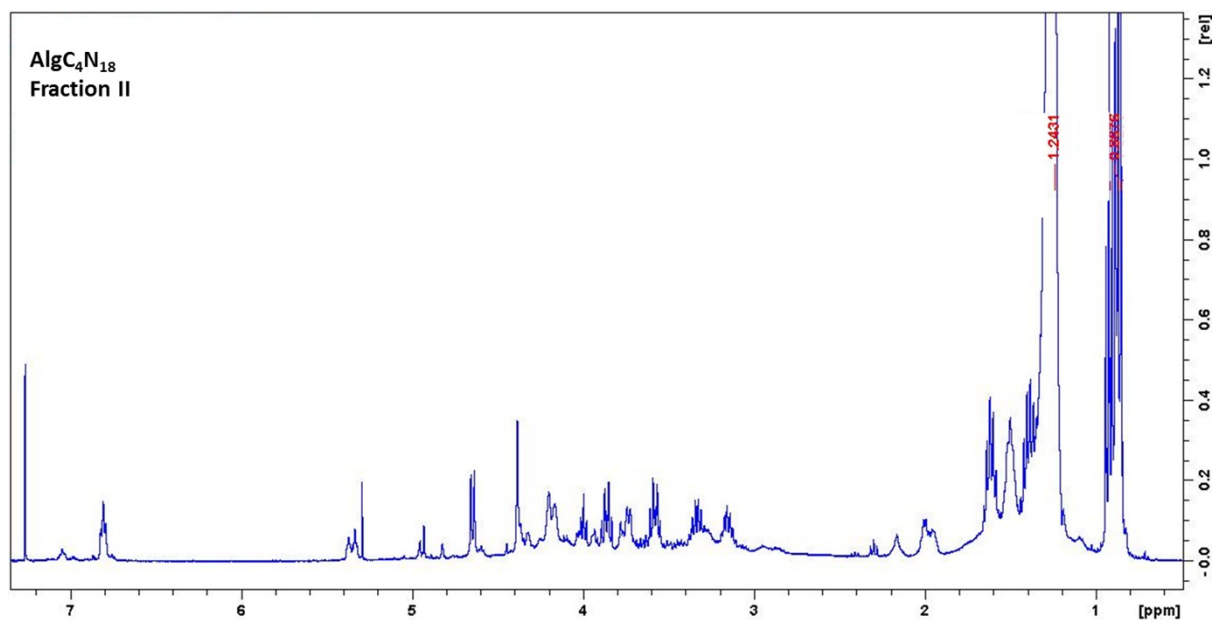

Fig.24a

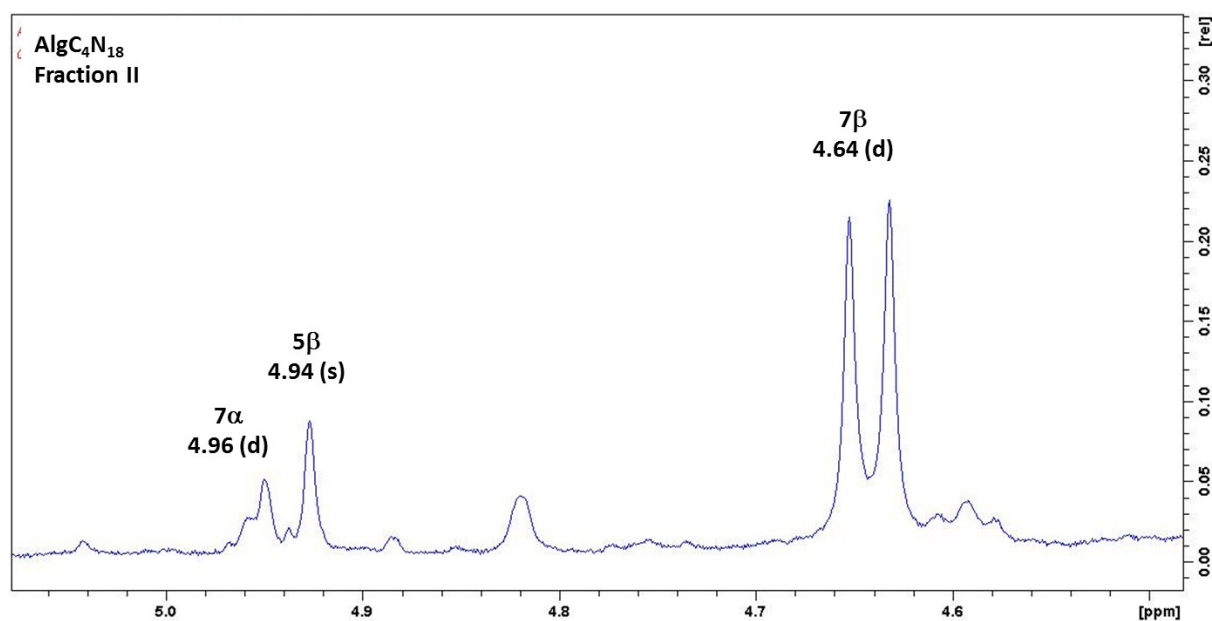

Fig.24b

**Fig.25**  $^{13}\text{C}$  (JMod) NMR spectrum ( $\text{CDCl}_3$ ) of **Fraction II** enriched in isomer **7 $\beta$** ,  $\beta$ -L-Gulp (major product) and isomers **7 $\alpha$** ,  $\alpha$ -L-Gulp and **5 $\beta$** ,  $\beta$ -L-Gulp (minor products), isolated after silica gel column chromatography of the **AlgC<sub>4</sub>N<sub>18</sub>** composition. In Fig.25a, full spectrum; in Fig.25b, zoom of the anomeric  $^{13}\text{C}$  area.

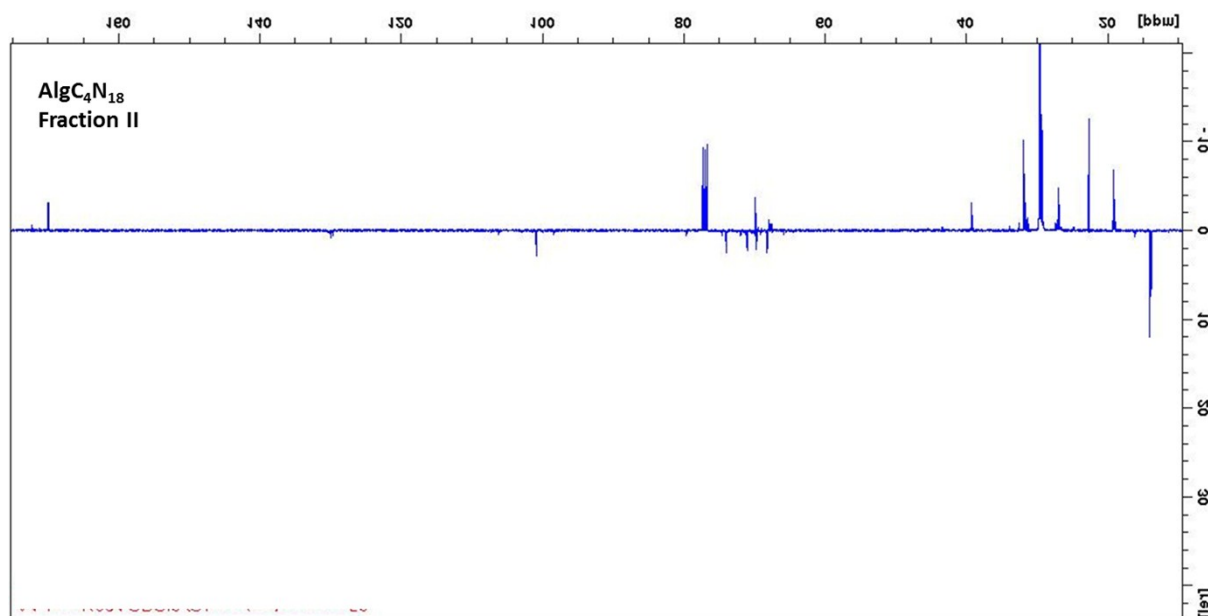

Fig.25a

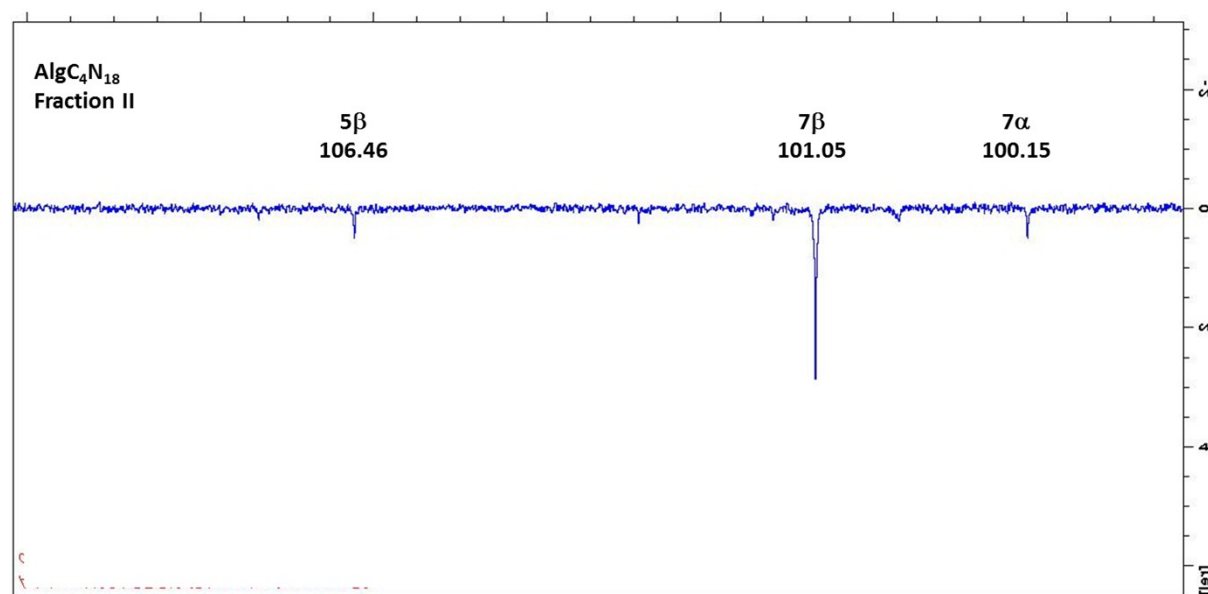

Fig.25b
